# Supplementary material for: Using GECKO-A to derive mechanistic understanding of secondary organic aerosol formation from the ubiquitous but understudied camphene
Source: Copernicus journal article supplement (doi:10.5194/acp-21-11467-2021), 2021-07-30
Supplement: Supplementary file 1 [file acp-21-11467-2021-supplement.pdf]

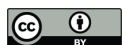

*Supplement of*

## **Using GECKO-A to derive mechanistic understanding of secondary organic aerosol formation from the ubiquitous but understudied camphene**

**Isaac Kwadjo Afreh et al.**

*Correspondence to:* Kelley Claire Barsanti ([kbarsanti@engr.ucr.edu](mailto:kbarsanti@engr.ucr.edu))

The copyright of individual parts of the supplement might differ from the article licence.

## List of Tables

|                                                                                                                                                                                                                                                                                                                                                                                                                                                                                                        |   |
|--------------------------------------------------------------------------------------------------------------------------------------------------------------------------------------------------------------------------------------------------------------------------------------------------------------------------------------------------------------------------------------------------------------------------------------------------------------------------------------------------------|---|
| Table S1: SOA data compiled from published chamber studies for photooxidation and ozonolysis of $\alpha$ -pinene and limonene. ....                                                                                                                                                                                                                                                                                                                                                                    | 4 |
| Table S2: Normalized emission factor (EF) for model surrogates representing top five monoterpenes (by EF) from black spruce, Douglas fir, and lodgepole pine (Hatch et al., 2015, 2017). In Assignment 1, $\alpha$ -pinene is used to represent all monoterpenes except limonene. In Assignment 2, camphene is represented as 50 % $\alpha$ -pinene and 50 % limonene. EFs of assignments 1 and 2 for lodgepole pine are the same, because camphene is not one of the top five monoterpenes by EF. ... | 6 |
| Table S3: Two-product SOA yield parameters for $\alpha$ -pinene and limonene based on Griffin et al. (1999). ....                                                                                                                                                                                                                                                                                                                                                                                      | 6 |
| Table S4: Volatility basis set (VBS) parameters (low NO <sub>x</sub> , dry) based on Pathak et al. (2007b) (for $\alpha$ -pinene) and Zhang et al. (2006) (for limonene). ....                                                                                                                                                                                                                                                                                                                         | 6 |

## List of Figures

|                                                                                                                                                                                                                                                                                                                                                                                                                                                                                                                                                            |    |
|------------------------------------------------------------------------------------------------------------------------------------------------------------------------------------------------------------------------------------------------------------------------------------------------------------------------------------------------------------------------------------------------------------------------------------------------------------------------------------------------------------------------------------------------------------|----|
| Figure S1: Initial oxidation pathways of $\alpha$ -pinene with O <sub>3</sub> as represented in GECKO-A (inorganic products are not shown). ....                                                                                                                                                                                                                                                                                                                                                                                                           | 7  |
| Figure S2: Initial oxidation pathways of limonene with O <sub>3</sub> as represented in GECKO-A (inorganic products are not shown). ....                                                                                                                                                                                                                                                                                                                                                                                                                   | 7  |
| Figure S3: Initial oxidation pathways of camphene with O <sub>3</sub> as represented in GECKO-A (inorganic products are not shown). ....                                                                                                                                                                                                                                                                                                                                                                                                                   | 8  |
| Figure S4: Initial oxidation pathways of $\alpha$ -pinene with NO <sub>3</sub> as represented in GECKO-A (inorganic products are not shown). ....                                                                                                                                                                                                                                                                                                                                                                                                          | 8  |
| Figure S5: Initial oxidation pathways of limonene with NO <sub>3</sub> as represented in GECKO-A (inorganic products are not shown). ....                                                                                                                                                                                                                                                                                                                                                                                                                  | 9  |
| Figure S6: Initial oxidation pathways of camphene with NO <sub>3</sub> as represented in GECKO-A (inorganic products are not shown). ....                                                                                                                                                                                                                                                                                                                                                                                                                  | 9  |
| Figure S7: Percentage of precursor consumed by OH (black), O <sub>3</sub> (red), and NO <sub>3</sub> (blue) as a function of fraction of precursor reacted for $\alpha$ -pinene and limonene under photooxidation and ozonolysis (for lower initial precursor mixing ratio of 50 ppb). ....                                                                                                                                                                                                                                                                | 10 |
| Figure S8: The mixing ratios of HO <sub>2</sub> , OH, O <sub>3</sub> , NO, NO <sub>2</sub> , and NO <sub>3</sub> as a function of time for $\alpha$ -pinene (blue line) and limonene (red line) (with the low initial hydrocarbon (LHC) mixing ratio of 50 ppb) during photooxidation (P) and dark ozonolysis (DO) simulations. ....                                                                                                                                                                                                                       | 11 |
| Figure S9: Number of functional groups associated with gas- and particle-phase species as a function of carbon number. Results are shown for camphene, $\alpha$ -pinene, and limonene after 12 hours of oxidation under photooxidation (P) and dark ozonolysis (DO) with lower hydrocarbon (LHC) mixing ratio of 50 ppb. The markers are sized by the ratio of their mixing ratio (in ppbC) to the initial mixing ratio of the precursor (in ppbC). The colors of the markers are scaled by volatility (represented by saturation concentration, C*). .... | 12 |

|                                                                                                                                                                                                                                                                                                                                                                                                                                                                                                                                                                                                                                                                         |    |
|-------------------------------------------------------------------------------------------------------------------------------------------------------------------------------------------------------------------------------------------------------------------------------------------------------------------------------------------------------------------------------------------------------------------------------------------------------------------------------------------------------------------------------------------------------------------------------------------------------------------------------------------------------------------------|----|
| Figure S10: Top 10 gas-phase products from limonene photooxidation at the end of the low hydrocarbon (P_LHC) simulation.....                                                                                                                                                                                                                                                                                                                                                                                                                                                                                                                                            | 13 |
| Figure S11: Top 10 particle-phase products from limonene photooxidation at the end of the low hydrocarbon (P_LHC) simulation.....                                                                                                                                                                                                                                                                                                                                                                                                                                                                                                                                       | 13 |
| Figure S12: Top 10 gas-phase products from limonene dark ozonolysis at the end of the low hydrocarbon (DO_LHC) simulation.....                                                                                                                                                                                                                                                                                                                                                                                                                                                                                                                                          | 14 |
| Figure S13: Top 10 particle-phase products from limonene dark ozonolysis at the end of the low hydrocarbon (DO_LHC) simulation.....                                                                                                                                                                                                                                                                                                                                                                                                                                                                                                                                     | 14 |
| Figure S14: Simulated SOA mass as a function of time for $\alpha$ -pinene and limonene during photooxidation and dark ozonolysis with low hydrocarbon mixing ratio (50 ppb). ....                                                                                                                                                                                                                                                                                                                                                                                                                                                                                       | 15 |
| Figure S15: Simulated average O/C as a function of time for $\alpha$ -pinene and limonene during photooxidation and dark ozonolysis with low hydrocarbon mixing ratio (50 ppb). ....                                                                                                                                                                                                                                                                                                                                                                                                                                                                                    | 15 |
| Figure S 16: Concentration of top 10 gas- and particle-phase products as a function of time for $\alpha$ -pinene and limonene during photooxidation with low hydrocarbon mixing ratio (50 ppb). ....                                                                                                                                                                                                                                                                                                                                                                                                                                                                    | 16 |
| Figure S 17: Concentration of top 10 gas- and particle-phase products as a function of time for $\alpha$ -pinene and limonene during dark ozonolysis with low hydrocarbon mixing ratio (50 ppb).....                                                                                                                                                                                                                                                                                                                                                                                                                                                                    | 16 |
| Figure S18: Simulated SOA yield as a function of time (a and b) and carbon budget (c to f) for $\alpha$ -pinene and limonene during photooxidation (a, c, e) and dark ozonolysis (b, d, f). The SOA yield curve for $\alpha$ -pinene is represented by a blue line; limonene is represented by a red line. For the carbon budget plots, the mixing ratios of the precursor (black line), particle-phase organics (magenta line), gas-phase organics (green line), and CO+CO <sub>2</sub> (blue line) are expressed as carbon atom ratios (in ppbC)/initial precursor (in ppbC). The results shown are for the high hydrocarbon mixing ratio (150 ppb) simulations. .... | 17 |
| Figure S19: Percentage of precursor consumed by OH (black), O <sub>3</sub> (red), and NO <sub>3</sub> (blue) as a function of fraction of precursor reacted for $\alpha$ -pinene and limonene under photooxidation and ozonolysis (for higher initial precursor concentration of 150 ppb). ....                                                                                                                                                                                                                                                                                                                                                                         | 18 |
| Figure S20: Mixing ratios of HO <sub>2</sub> , OH, O <sub>3</sub> , NO, NO <sub>2</sub> , and NO <sub>3</sub> as function of time for limonene (red line), camphene (black line), and $\alpha$ -pinene (blue line) during the photooxidation and ozonolysis (with higher initial hydrocarbon mixing ratio of 150 ppb).....                                                                                                                                                                                                                                                                                                                                              | 19 |
| Figure S21: Number of functional groups associated with gas- and particle-phase species as a function of carbon number. Results are shown for camphene, $\alpha$ -pinene, and limonene after 12 hours of oxidation under photooxidation (P) and dark ozonolysis (DO) with higher hydrocarbon (LHC) mixing ratio of 150 ppb. The markers are sized by the ratio of their mixing ratio (in ppbC) to the initial mixing ratio of the precursor (in ppbC). The colors of the markers are scaled by volatility (represented by saturation concentration, C*.).....                                                                                                           | 20 |
| Figure S22: Top 10 gas-phase products from $\alpha$ -pinene photooxidation at the end of the high hydrocarbon (P_HHC) simulations. ....                                                                                                                                                                                                                                                                                                                                                                                                                                                                                                                                 | 21 |
| Figure S23: Top 10 particle-phase products from $\alpha$ -pinene photooxidation at the end of the high hydrocarbon (P_HHC) simulations. ....                                                                                                                                                                                                                                                                                                                                                                                                                                                                                                                            | 21 |
| Figure S24: Top 10 gas-phase products from $\alpha$ -pinene dark ozonolysis at the end of the high hydrocarbon (DO_HHC) simulations. ....                                                                                                                                                                                                                                                                                                                                                                                                                                                                                                                               | 22 |

|                                                                                                                                                                                                                                                                                                                                                                                                                                                                                                                                                                                                                                                                                                                                                                                                                                                                                                    |    |
|----------------------------------------------------------------------------------------------------------------------------------------------------------------------------------------------------------------------------------------------------------------------------------------------------------------------------------------------------------------------------------------------------------------------------------------------------------------------------------------------------------------------------------------------------------------------------------------------------------------------------------------------------------------------------------------------------------------------------------------------------------------------------------------------------------------------------------------------------------------------------------------------------|----|
| Figure S25: Top 10 particle-phase products from $\alpha$ -pinene dark ozonolysis at the end of the high hydrocarbon (DO_HHC) simulations.....                                                                                                                                                                                                                                                                                                                                                                                                                                                                                                                                                                                                                                                                                                                                                      | 22 |
| Figure S26: Top 10 gas-phase products from limonene photooxidation at the end of the high hydrocarbon (P_HHC). ....                                                                                                                                                                                                                                                                                                                                                                                                                                                                                                                                                                                                                                                                                                                                                                                | 23 |
| Figure S27: Top 10 particle-phase products from limonene photooxidation at the end of the high hydrocarbon (P_HHC).<br>.....                                                                                                                                                                                                                                                                                                                                                                                                                                                                                                                                                                                                                                                                                                                                                                       | 23 |
| Figure S28: Top 10 gas-phase products from limonene dark ozonolysis at the end of the high hydrocarbon (DO_HHC).                                                                                                                                                                                                                                                                                                                                                                                                                                                                                                                                                                                                                                                                                                                                                                                   | 24 |
| Figure S29: Top 10 particle-phase products from limonene dark ozonolysis at the end of the high hydrocarbon (DO_HHC). ....                                                                                                                                                                                                                                                                                                                                                                                                                                                                                                                                                                                                                                                                                                                                                                         | 24 |
| Figure S30: Percentage of precursor reacted by OH (black), O <sub>3</sub> (red), and NO <sub>3</sub> (blue) as a function of fraction of precursor reacted for $\alpha$ -pinene, camphene, and limonene during controlled reactivity (CR) simulations. ....                                                                                                                                                                                                                                                                                                                                                                                                                                                                                                                                                                                                                                        | 25 |
| Figure S31: Top 10 gas-phase products from camphene at the end of the controlled reactivity simulation.....                                                                                                                                                                                                                                                                                                                                                                                                                                                                                                                                                                                                                                                                                                                                                                                        | 25 |
| Figure S32: Top 10 particle-phase products from camphene at the end of the controlled reactivity simulation.....                                                                                                                                                                                                                                                                                                                                                                                                                                                                                                                                                                                                                                                                                                                                                                                   | 26 |
| Figure S33: (a) Simulated SOA yield as a function of atmospheric aging time for: camphene (black line), 50 % $\alpha$ -pinene + 50 % limonene (magenta line), $\alpha$ -pinene with camphene rate constants (blue line), limonene with camphene rate constants (red line), and 50 % $\alpha$ -pinene + 50 % limonene where the rate constants of $\alpha$ -pinene and limonene were replaced with the rate constants of camphene (green line); and (b) mass percentage of particle-phase compounds binned in four volatility categories at the end of the controlled reactivity simulations for: camphene, 50 % $\alpha$ -pinene + 50 % limonene, $\alpha$ -pinene with camphene rate constants, limonene with camphene rate constants, and 50 % $\alpha$ -pinene + 50 % limonene where the rate constants of $\alpha$ -pinene and limonene were replaced with the rate constants of camphene..... | 26 |

**Table S1: SOA data compiled from published chamber studies for photooxidation and ozonolysis of  $\alpha$ -pinene and limonene.**

| Condition                       | T<br>(K)    | [O <sub>3</sub> ] <sub>0</sub><br>(ppb) | NO <sub>x</sub><br>(ppb) | [HC] <sub>0</sub><br>(ppb) | $\Delta$ H <sub>C</sub><br>( $\mu\text{g m}^{-3}$ ) | SOA mass<br>( $\mu\text{g m}^{-3}$ ) | SOA<br>yield | Reference               |
|---------------------------------|-------------|-----------------------------------------|--------------------------|----------------------------|-----------------------------------------------------|--------------------------------------|--------------|-------------------------|
| $\alpha$ -Pinene photooxidation | 312-306     |                                         | 230                      | 150                        | 804.6                                               | 44.0                                 | 0.06         | Kim and Paulson (2013)  |
| $\alpha$ -Pinene photooxidation | 310-312-306 |                                         | 110                      | 152                        | 788.8                                               | 103.0                                | 0.14         | Kim and Paulson (2013)  |
| $\alpha$ -Pinene photooxidation | 306-309     |                                         | 50                       | 142                        | 743.9                                               | 107.0                                | 0.16         | Kim and Paulson (2013)  |
| $\alpha$ -Pinene photooxidation | 312-319-315 |                                         | 47                       | 153                        | 683.0                                               | 118.0                                | 0.17         | Kim and Paulson (2013)  |
| $\alpha$ -Pinene photooxidation | 300         |                                         |                          | 51                         | 260.0                                               | 46.0                                 | 0.18         | Mcvay et al. (2016)     |
| $\alpha$ -Pinene photooxidation | 300         |                                         |                          | 56                         | 280.0                                               | 65.0                                 | 0.23         | Mcvay et al. (2016)     |
| $\alpha$ -Pinene photooxidation | 300         |                                         |                          | 53                         | 240.0                                               | 52.0                                 | 0.22         | Mcvay et al. (2016)     |
| $\alpha$ -Pinene photooxidation | 298         |                                         |                          | 51                         | 268.0                                               | 72.0                                 | 0.27         | Mcvay et al. (2016)     |
| $\alpha$ -Pinene photooxidation | 297         |                                         |                          | 53                         | 205.0                                               | 35.0                                 | 0.17         | Mcvay et al. (2016)     |
| $\alpha$ -Pinene photooxidation | 297         |                                         |                          | 49                         | 195.0                                               | 47.0                                 | 0.24         | Mcvay et al. (2016)     |
| $\alpha$ -Pinene photooxidation | 293         |                                         |                          |                            | 616.6                                               | 199.0                                | 0.32         | Lee et al. (2006b)      |
| $\alpha$ -Pinene photooxidation | 298         |                                         | 0                        |                            | 76.8                                                | 29.3                                 | 0.38         | Ng et al. (2007)        |
| $\alpha$ -Pinene photooxidation | 298         |                                         | 1                        |                            | 264.2                                               | 121.3                                | 0.46         | Ng et al. (2007)        |
| $\alpha$ -Pinene photooxidation | 296         |                                         | 198                      |                            | 73.4                                                | 15.6                                 | 0.21         | Ng et al. (2007)        |
| $\alpha$ -Pinene photooxidation | 299         |                                         | 938                      |                            | 69.8                                                | 4.5                                  | 0.06         | Ng et al. (2007)        |
| $\alpha$ -Pinene photooxidation | 298         |                                         | 968                      |                            | 259.2                                               | 40.8                                 | 0.16         | Ng et al. (2007)        |
| $\alpha$ -Pinene photooxidation |             |                                         | 0                        |                            | 259.9                                               | 63.9                                 | 0.25         | Chhabra et al. (2011)   |
| $\alpha$ -Pinene photooxidation |             |                                         | 400                      |                            | 265.6                                               | 53.7                                 | 0.20         | Chhabra et al. (2011)   |
| Limonene photooxidation         | 310-305     |                                         | 300                      | 208                        | 1110.4                                              | 96-287                               | 0.35         | Kim and Paulson (2013)  |
| Limonene photooxidation         | 309-313     |                                         | 98                       | 140                        | 735.5                                               | 34-195                               | 0.35         | Kim and Paulson (2013)  |
| Limonene photooxidation         | 297-299     |                                         | 120                      | 157                        | 801.0                                               | 32-214                               | 0.37         | Kim and Paulson (2013)  |
| Limonene photooxidation         | 311-315     |                                         | 41                       | 130                        | 680.0                                               | 11-219                               | 0.43         | Kim and Paulson (2013)  |
| Limonene photooxidation         | 308-312-307 |                                         | 39                       | 130                        | 690.6                                               | 14-275                               | 0.47         | Kim and Paulson (2013)  |
| Limonene photooxidation         | 313.4       |                                         | 105                      |                            | 109.0                                               | 9.5                                  | 0.09         | Griffin et al. (1999)   |
| Limonene photooxidation         | 313.4       |                                         | 80.2                     |                            | 186.2                                               | 49.6                                 | 0.27         | Griffin et al. (1999)   |
| Limonene photooxidation         | 309.4       |                                         | 139                      |                            | 265.2                                               | 79.1                                 | 0.30         | Griffin et al. (1999)   |
| Limonene photooxidation         | 309.4       |                                         | 140                      |                            | 348.8                                               | 120.2                                | 0.34         | Griffin et al. (1999)   |
| Limonene photooxidation         | 294         |                                         |                          |                            | 676.5                                               | 394.0                                | 0.58         | Lee et al. (2006b)      |
| $\alpha$ -Pinene ozonolysis     | 299-300     | 500                                     |                          | 143                        | 592.2                                               | 28-230                               | 0.46         | Kim and Paulson (2013)  |
| $\alpha$ -Pinene ozonolysis     | 296-299     | 500                                     |                          | 150                        | 724.3                                               | 39-271                               | 0.44         | Kim and Paulson (2013)  |
| $\alpha$ -Pinene ozonolysis     | 296-301     | 500                                     |                          | 170                        | 866.2                                               | 37-271                               | 0.40         | Kim and Paulson (2013)  |
| $\alpha$ -Pinene ozonolysis     | 296-295     | 500                                     |                          | 160                        | 897.5                                               | 71-349                               | 0.45         | Kim and Paulson (2013)  |
| $\alpha$ -Pinene ozonolysis     | 291-293     | 500                                     |                          | 126                        | 669.8                                               | 34-215                               | 0.39         | Kim and Paulson (2013)  |
| $\alpha$ -Pinene ozonolysis     |             | 200                                     |                          | 49.5                       | 282.0                                               | 42.3                                 | 0.15         | Kourtchev et al. (2014) |
| $\alpha$ -Pinene ozonolysis     |             | 200                                     |                          | 50.5                       | 312.5                                               | 50.0                                 | 0.16         | Kourtchev et al. (2014) |

|                             |                 |      |      |                  |        |                |      |                         |
|-----------------------------|-----------------|------|------|------------------|--------|----------------|------|-------------------------|
| $\alpha$ -Pinene ozonolysis |                 | 200  |      | 55.2             | 349.4  | 55.9           | 0.16 | Kourtchev et al. (2014) |
| $\alpha$ -Pinene ozonolysis | 298             | 100  |      | 290.2 $\pm$ 23.2 | 278.1  | 62.0 $\pm$ 1.2 | 0.23 | Nah et al. (2016)       |
| $\alpha$ -Pinene ozonolysis | 298             | 100  |      | 280.5 $\pm$ 22.4 | 267.0  | 63.0 $\pm$ 0.8 | 0.23 | Nah et al. (2016)       |
| $\alpha$ -Pinene ozonolysis | 298             | 100  |      | 238.7 $\pm$ 19.1 | 222.5  | 50.6 $\pm$ 1.6 | 0.23 | Nah et al. (2016)       |
| $\alpha$ -Pinene ozonolysis | 298             | 500  |      | 274 $\pm$ 21.9   | 278.1  | 87.3 $\pm$ 0.3 | 0.32 | Nah et al. (2016)       |
| $\alpha$ -Pinene ozonolysis | 298             | 500  |      | 264 $\pm$ 21.2   | 261.4  | 75.7 $\pm$ 0.6 | 0.29 | Nah et al. (2016)       |
| $\alpha$ -Pinene ozonolysis | 298             | 500  |      | 236.1 $\pm$ 18.9 | 239.2  | 66.3 $\pm$ 1.9 | 0.28 | Nah et al. (2016)       |
| $\alpha$ -Pinene ozonolysis | 309.9           |      |      |                  | 89.3   | 7.4            | 0.08 | Griffin et al. (1999)   |
| $\alpha$ -Pinene ozonolysis | 309.9           |      |      |                  | 97.3   | 8.5            | 0.09 | Griffin et al. (1999)   |
| $\alpha$ -Pinene ozonolysis | 303.3           |      |      |                  | 169.4  | 30.3           | 0.18 | Griffin et al. (1999)   |
| $\alpha$ -Pinene ozonolysis | 303.3           |      |      |                  | 248.7  | 46.0           | 0.18 | Griffin et al. (1999)   |
| $\alpha$ -Pinene ozonolysis | 308             |      |      |                  | 306.7  | 52.3           | 0.17 | Griffin et al. (1999)   |
| $\alpha$ -Pinene ozonolysis | 308             |      |      |                  | 349.8  | 65.1           | 0.19 | Griffin et al. (1999)   |
| $\alpha$ -Pinene ozonolysis | 308             | 237  |      | 59.2             | 306.7  | 54.2           | 0.18 | Yu et al. (1999)        |
| $\alpha$ -Pinene ozonolysis | 308             | 269  |      | 67.2             | 350.3  | 65.1           | 0.19 | Yu et al. (1999)        |
| $\alpha$ -Pinene ozonolysis | 306             | 74   |      | 107.1            | 244.3  | 38.8           | 0.16 | Yu et al. (1999)        |
| $\alpha$ -Pinene ozonolysis | 293             |      |      |                  | 1052.2 | 417.0          | 0.41 | Lee et al. (2006a)      |
| $\alpha$ -Pinene ozonolysis | 298.15 $\pm$ 12 | 300  |      |                  | 126.8  | 35.6           | 0.28 | Chen et al. (2011)      |
| $\alpha$ -Pinene ozonolysis | 298.15 $\pm$ 13 | 300  |      |                  | 11.7   | 1.2            | 0.10 | Chen et al. (2011)      |
| $\alpha$ -Pinene ozonolysis | 298.15 $\pm$ 14 | 300  |      |                  | 15.6   | 1.9            | 0.12 | Chen et al. (2011)      |
| $\alpha$ -Pinene ozonolysis | 298.15 $\pm$ 15 | 300  |      |                  | 78.9   | 15.4           | 0.20 | Chen et al. (2011)      |
| $\alpha$ -Pinene ozonolysis | 298.15 $\pm$ 16 | 300  |      |                  | 506.5  | 95.2           | 0.19 | Chen et al. (2011)      |
| $\alpha$ -Pinene ozonolysis | 298.15 $\pm$ 17 | 300  |      |                  | 506.5  | 138.0          | 0.27 | Chen et al. (2011)      |
| $\alpha$ -Pinene ozonolysis | 298.15 $\pm$ 18 | 300  |      |                  | 36.7   | 7.0            | 0.19 | Chen et al. (2011)      |
| $\alpha$ -Pinene ozonolysis | 298.15 $\pm$ 19 | 300  |      |                  | 5.0    | 0.5            | 0.10 | Chen et al. (2011)      |
| $\alpha$ -Pinene ozonolysis |                 |      | 0    |                  | 278.1  | 62.0           | 0.22 | Chhabra et al. (2011)   |
| Limonene ozonolysis         | 298-300         | 500  |      | 167              | 925.8  | 579.0          | 0.78 | Kim and Paulson (2013)  |
| Limonene ozonolysis         | 293-295         | 500  |      | 198              | 1116.3 | 614.0          | 0.72 | Kim and Paulson (2013)  |
| Limonene ozonolysis         | 294-296         | 500  |      | 150              | 842.8  | 454.0          | 0.72 | Kim and Paulson (2013)  |
| Limonene ozonolysis         | 295-296         | 69.7 | 33.7 | 154              | 257.0  | 135.7          | 0.49 | Chen et al. (2017)      |
| Limonene ozonolysis         | 295-296         | 71   | 35.2 | 150              | 269.0  | 137.2          | 0.51 | Chen et al. (2017)      |
| Limonene ozonolysis         | 295-297         | 72.1 | 58.9 | 158              | 220.0  | 156.5          | 0.73 | Chen et al. (2017)      |
| Limonene ozonolysis         | 296-297         | 70.3 | 62.4 | 153              | 228.0  | 157.3          | 0.72 | Chen et al. (2017)      |
| Limonene ozonolysis         | 296-297         | 1.1  | 67.1 | 155              | 144.0  | 30.3           | 0.27 | Chen et al. (2017)      |
| Limonene ozonolysis         | 295-296         | 0.9  | 68.2 | 159              | 138.0  | 31.8           | 0.30 | Chen et al. (2017)      |

**Table S2: Normalized emission factor (EF) for model surrogates representing top five monoterpenes (by EF) from black spruce, Douglas fir, and lodgepole pine (Hatch et al., 2015, 2017). In Assignment 1,  $\alpha$ -pinene is used to represent all monoterpenes except limonene. In Assignment 2, camphene is represented as 50 %  $\alpha$ -pinene and 50 % limonene. EFs of assignments 1 and 2 for lodgepole pine are the same, because camphene is not one of the top five monoterpenes by EF.**

|              | Black Spruce                         |                   | Douglas Fir                          |                   | Lodgepole Pine                       |                   |
|--------------|--------------------------------------|-------------------|--------------------------------------|-------------------|--------------------------------------|-------------------|
|              | EF <sub><math>\alpha</math>pin</sub> | EF <sub>lim</sub> | EF <sub><math>\alpha</math>pin</sub> | EF <sub>lim</sub> | EF <sub><math>\alpha</math>pin</sub> | EF <sub>lim</sub> |
| Assignment 1 | 0.81                                 | 0.19              | 0.8                                  | 0.2               | 0.86                                 | 0.14              |
| Assignment 2 | 0.62                                 | 0.38              | 0.6                                  | 0.4               | 0.86                                 | 0.14              |

**Table S3: Two-product SOA yield parameters for  $\alpha$ -pinene and limonene based on Griffin et al. (1999).**

|                  | 2-product  |            |                 |                 |
|------------------|------------|------------|-----------------|-----------------|
|                  | $\alpha_1$ | $\alpha_2$ | C* <sub>1</sub> | C* <sub>2</sub> |
| $\alpha$ -pinene | 0.038      | 0.326      | 5.8             | 250.0           |
| limonene         | 0.239      | 0.363      | 18.2            | 188.7           |

**Table S4: Volatility basis set (VBS) parameters (low NO<sub>x</sub>, dry) based on Pathak et al. (2007b) (for  $\alpha$ -pinene) and Zhang et al. (2006) (for limonene).**

|                  | VBS (low NO <sub>x</sub> ) |      |       |       |      |
|------------------|----------------------------|------|-------|-------|------|
| C*               | 0                          | 1    | 10    | 100   | 1000 |
| $\alpha$ -pinene | -                          | 0.07 | 0.038 | 0.179 | 0.3  |
| limonene         | 0.03                       | 0.29 | 0.31  | 0.3   | 0.6  |

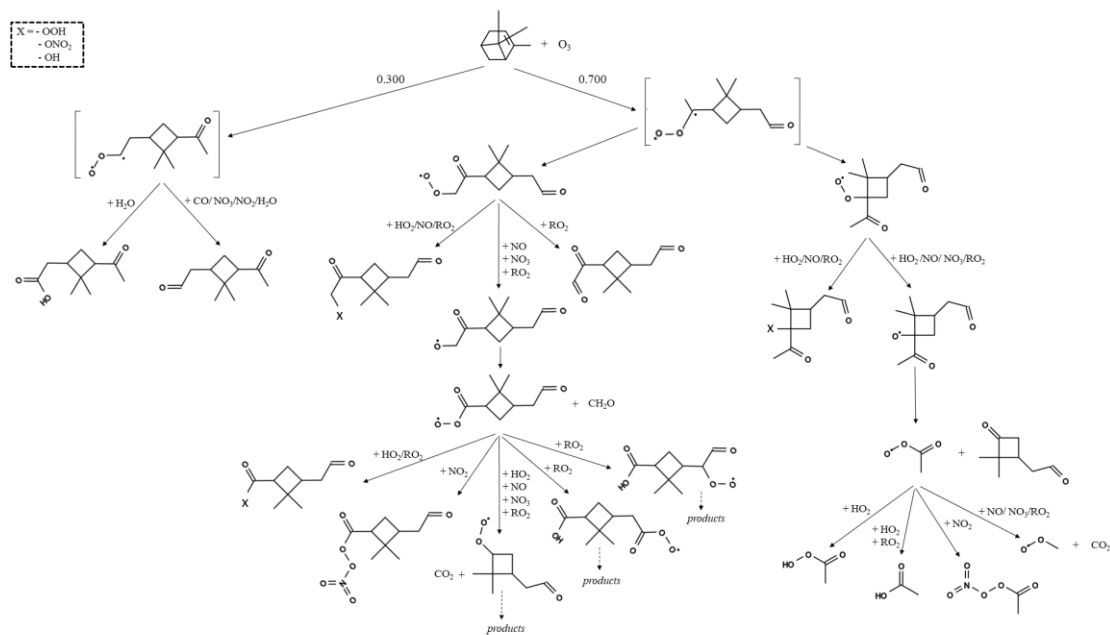

**Figure S1: Initial oxidation pathways of  $\alpha$ -pinene with  $O_3$  as represented in GECKO-A (inorganic products are not shown).**

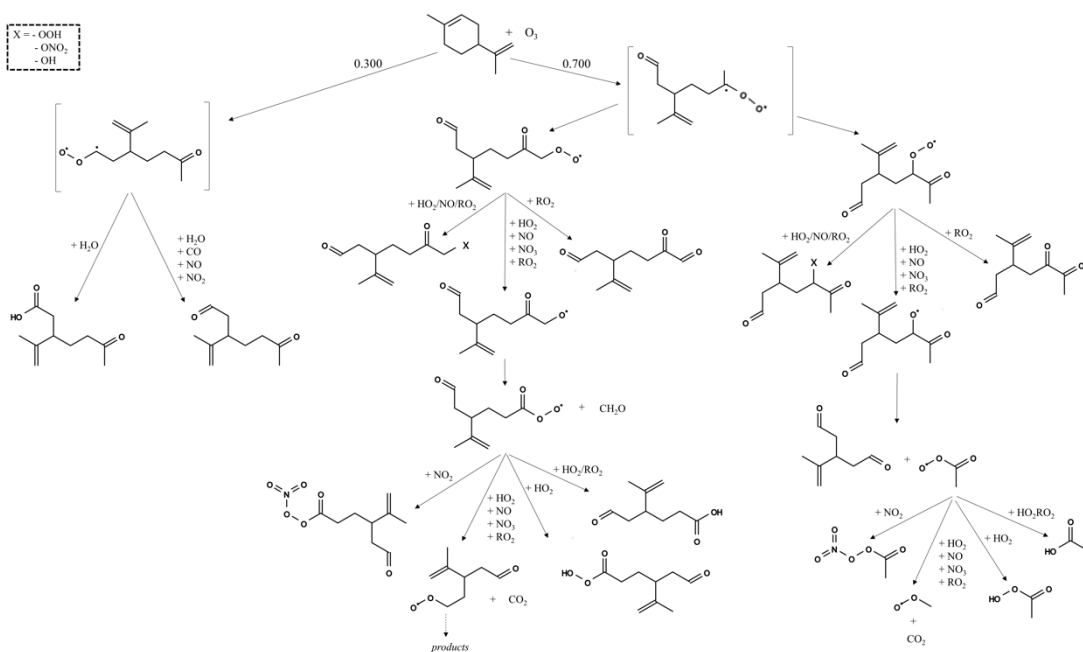

**Figure S2: Initial oxidation pathways of limonene with  $O_3$  as represented in GECKO-A (inorganic products are not shown).**



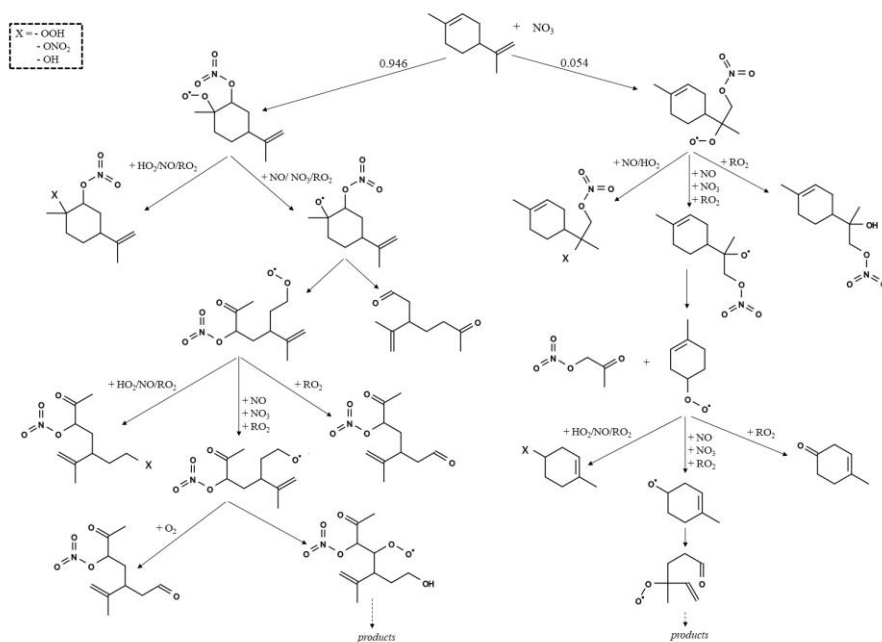

**Figure S5: Initial oxidation pathways of limonene with  $\text{NO}_3$  as represented in GECKO-A (inorganic products are not shown).**

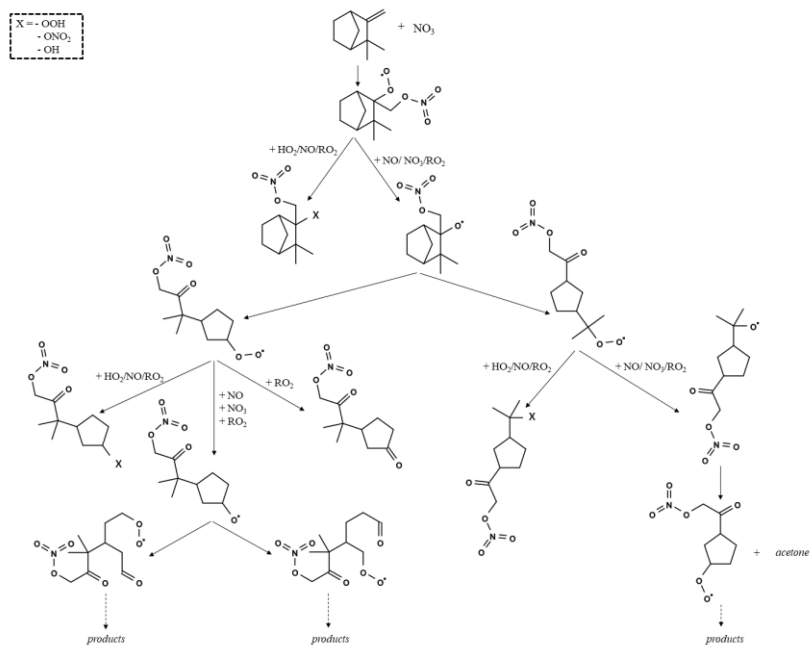

**Figure S6: Initial oxidation pathways of camphene with  $\text{NO}_3$  as represented in GECKO-A (inorganic products are not shown).**

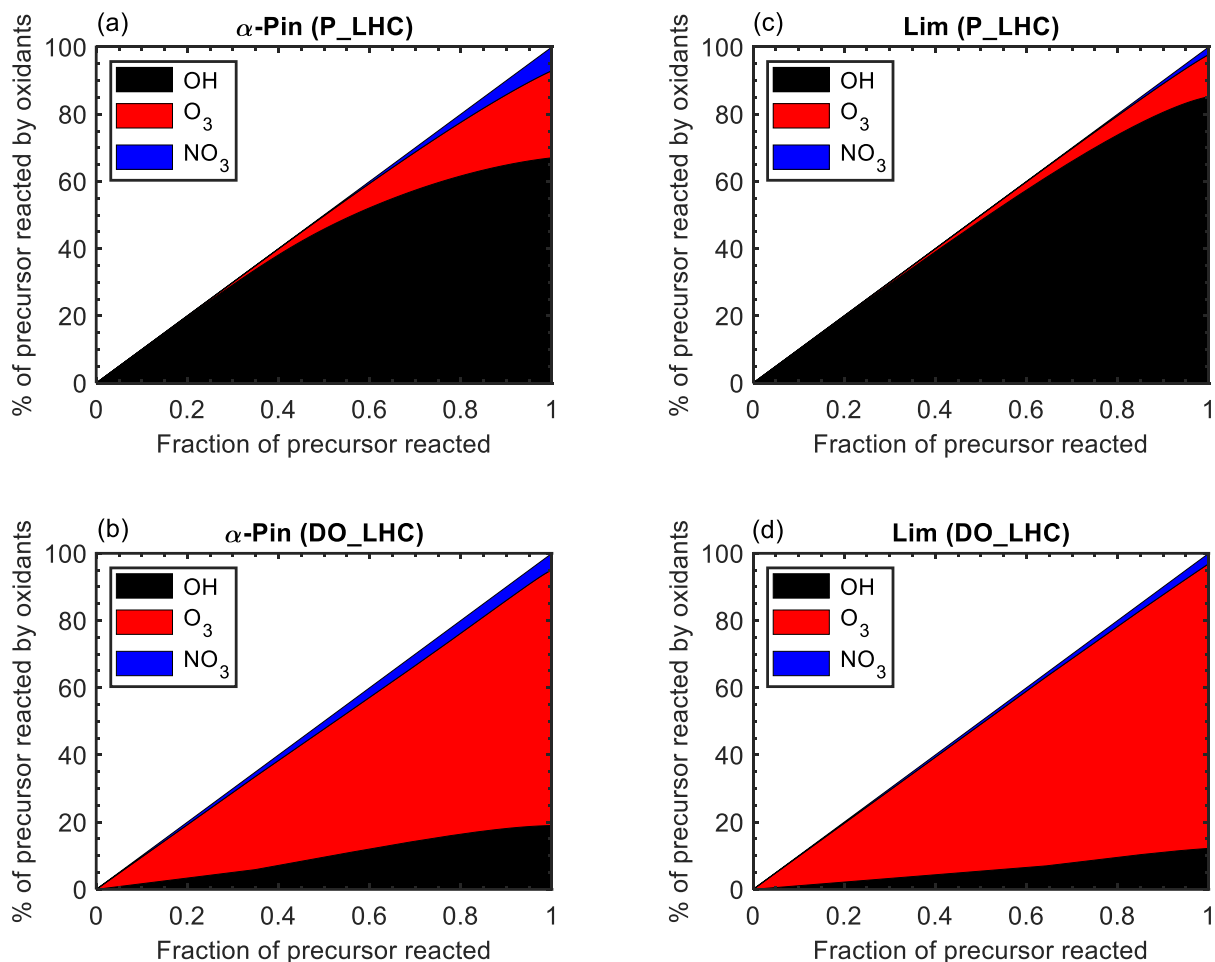

**Figure S7: Percentage of precursor consumed by OH (black), O<sub>3</sub> (red), and NO<sub>3</sub> (blue) as a function of fraction of precursor reacted for  $\alpha$ -pinene and limonene under photooxidation and ozonolysis (for lower initial precursor mixing ratio of 50 ppb).**

Figure S7 shows the percentage of the simulated precursor consumed by the three main oxidants: hydroxyl radical (OH), ozone (O<sub>3</sub>), and nitrate radical (NO<sub>3</sub>). Under photooxidation, both  $\alpha$ -pinene and limonene initially react predominantly with OH. As the reaction progresses (after ~30 % of the precursor is reacted), removal of the precursor by O<sub>3</sub> and NO<sub>3</sub> begins to grow until the precursor is completely reacted. The results in Fig. S7a indicate that ~67 % of  $\alpha$ -pinene is removed by OH, 25 % by O<sub>3</sub>, and ~8 % by NO<sub>3</sub>; similarly, as shown in Fig. S7c 85% of limonene is removed by OH, 12% by O<sub>3</sub> and 3 % by NO<sub>3</sub> during photooxidation. For  $\alpha$ -pinene ozonolysis, the consumption is largely by O<sub>3</sub> (~75 %) and OH (~20 %), to a lesser extent by NO<sub>3</sub> (~5 %); for limonene, consumption is dominated by O<sub>3</sub> (~85 %), followed by OH (~10 %), and NO<sub>3</sub> (~5 %). Unlike in many chamber experiments, there is no OH scrubber in the simulations. Also, as NO<sub>3</sub> is formed by reaction of O<sub>3</sub> with NO<sub>2</sub> during the dark ozonolysis simulation, a small percentage of the precursor reacts with NO<sub>3</sub> since no light is available to photolyze the NO<sub>3</sub>.

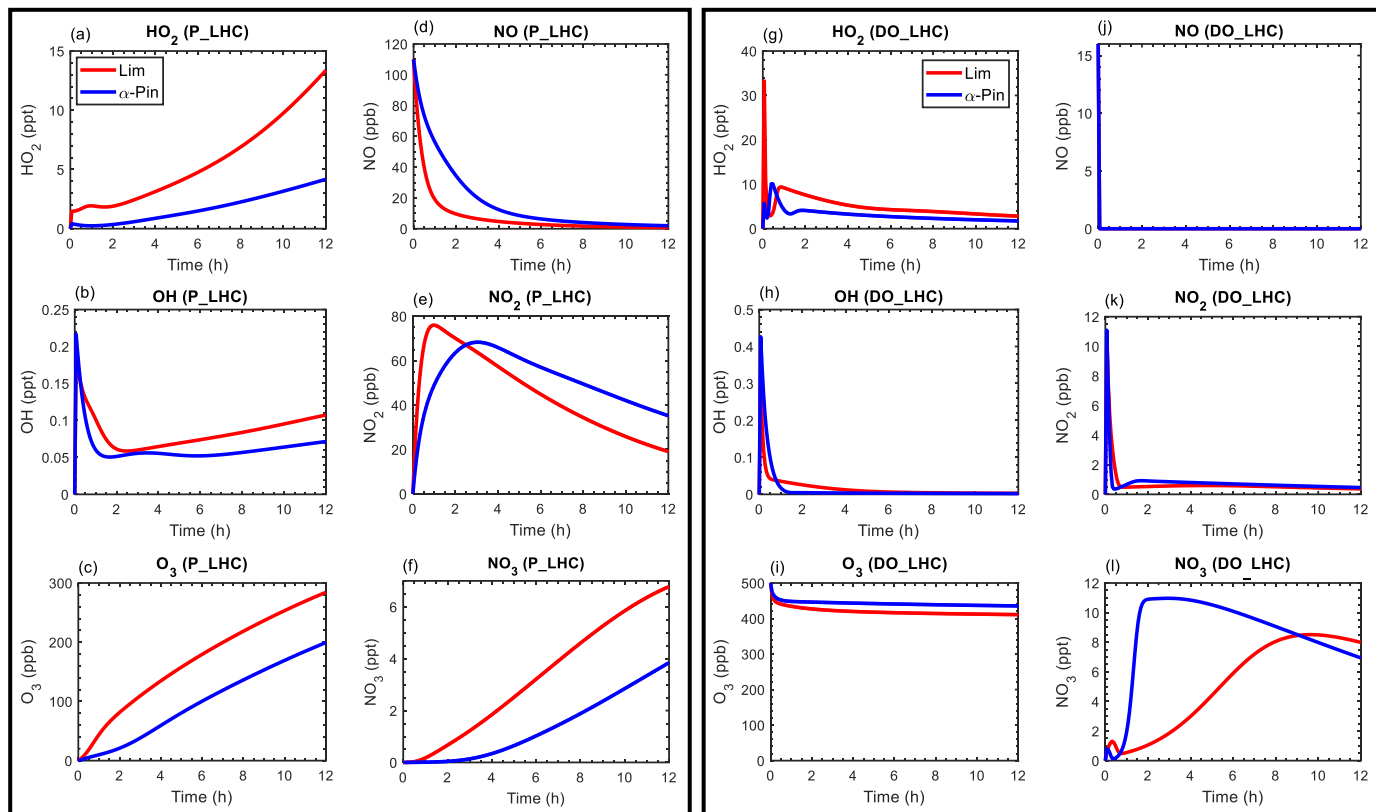

**Figure S8: The mixing ratios of HO<sub>2</sub>, OH, O<sub>3</sub>, NO, NO<sub>2</sub>, and NO<sub>3</sub> as a function of time for  $\alpha$ -pinene (blue line) and limonene (red line) (with the low initial hydrocarbon (LHC) mixing ratio of 50 ppb) during photooxidation (P) and dark ozonolysis (DO) simulations.**

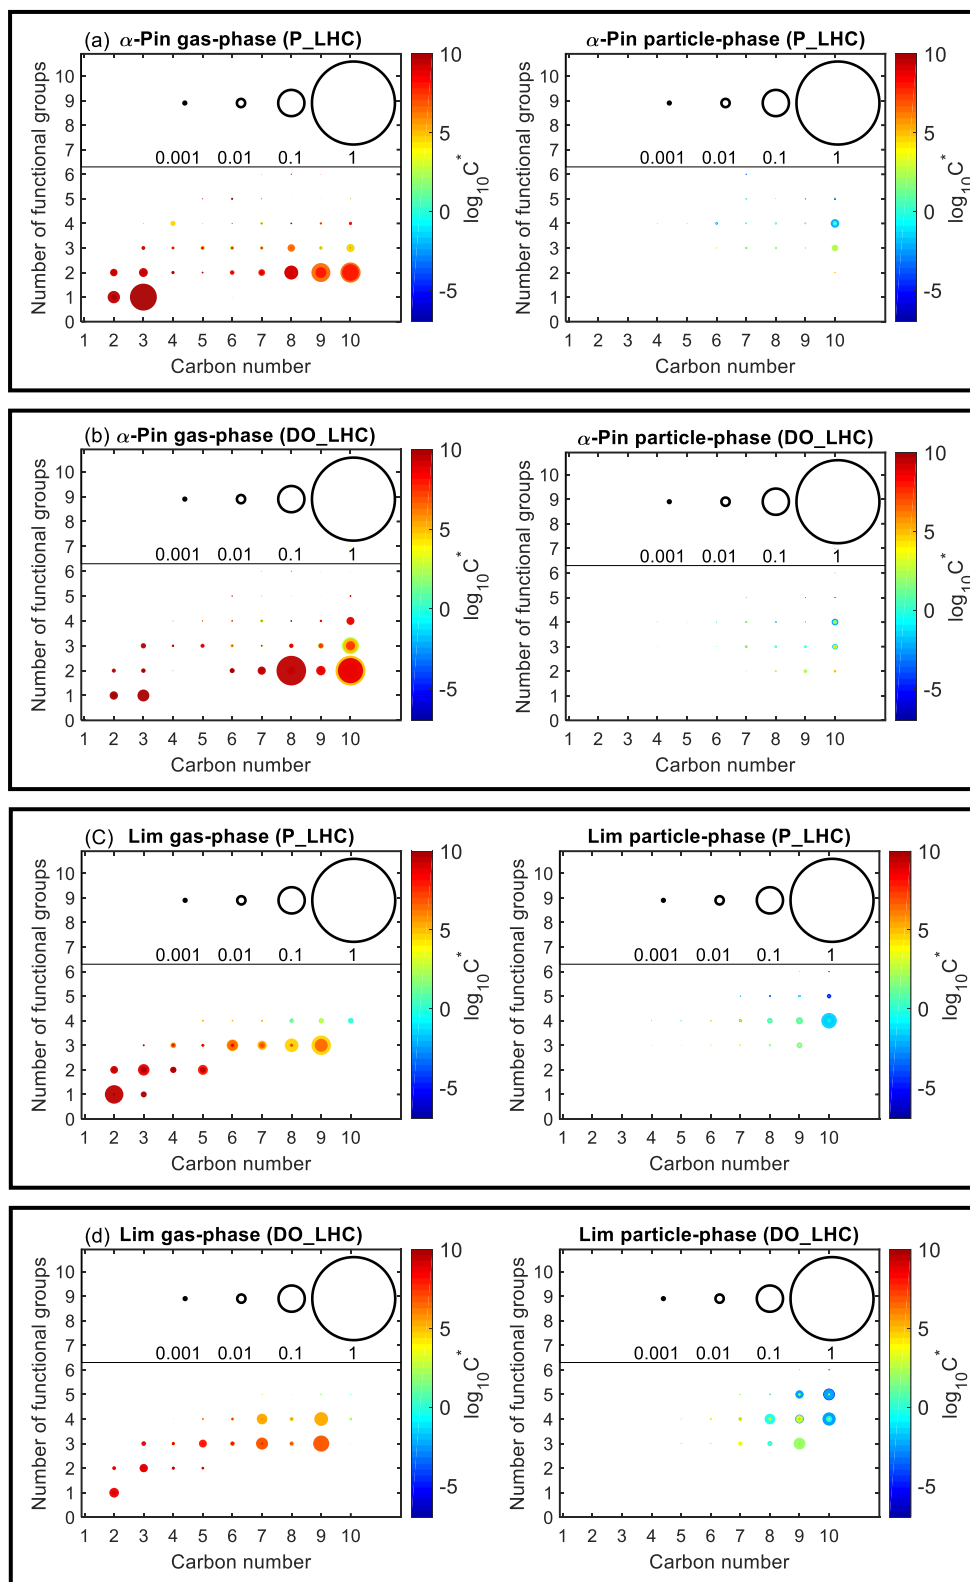

**Figure S9: Number of functional groups associated with gas- and particle-phase species as a function of carbon number. Results are shown for camphene,  $\alpha$ -pinene, and limonene after 12 hours of oxidation under photooxidation (P) and dark ozonolysis (DO) with lower hydrocarbon (LHC) mixing ratio of 50 ppb. The markers are sized by the ratio of their mixing ratio (in ppbC) to the initial mixing ratio of the precursor (in ppbC). The colors of the markers are scaled by volatility (represented by saturation concentration,  $C^*$ ).**

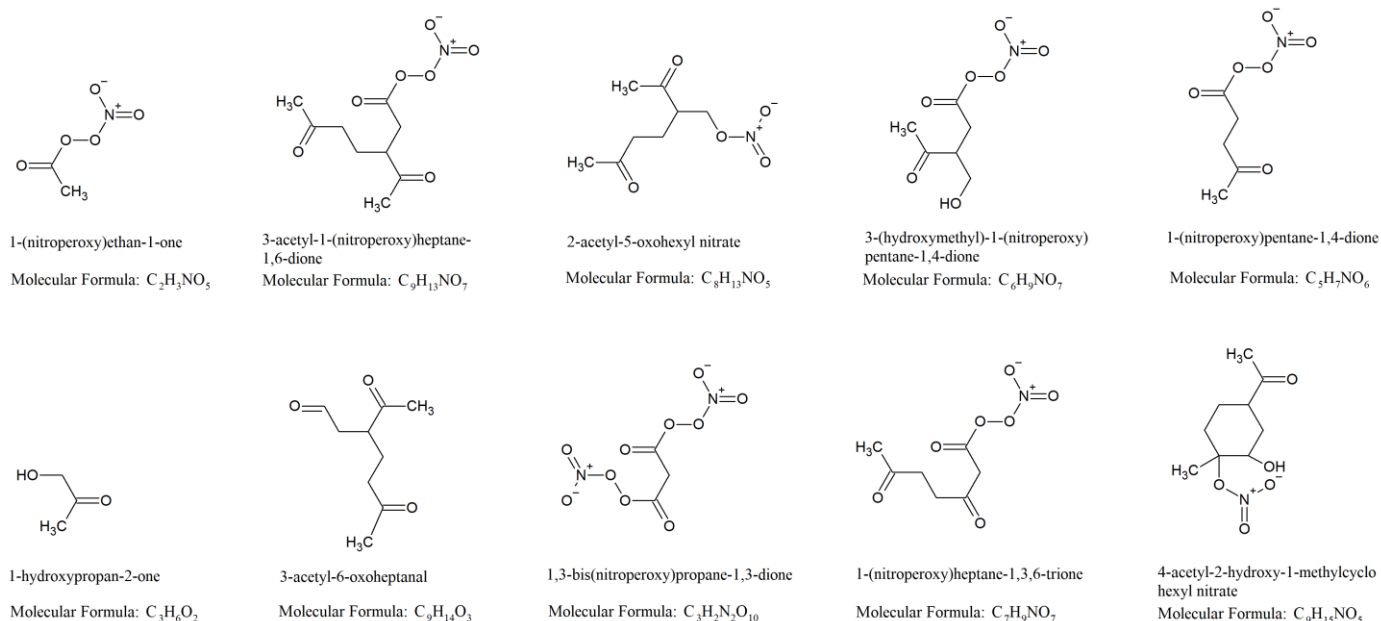

**Figure S10: Top 10 gas-phase products from limonene photooxidation at the end of the low hydrocarbon (P\_LHC) simulation.**

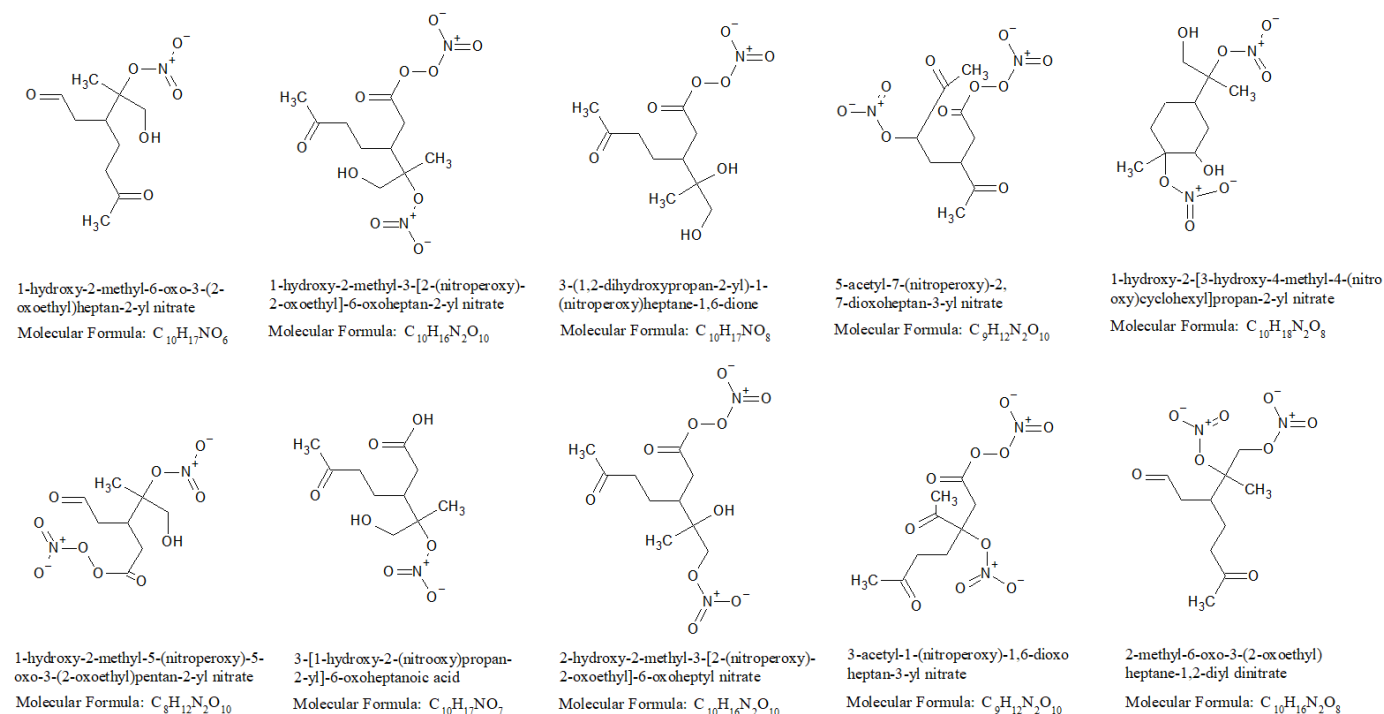

**Figure S11: Top 10 particle-phase products from limonene photooxidation at the end of the low hydrocarbon (P\_LHC) simulation.**

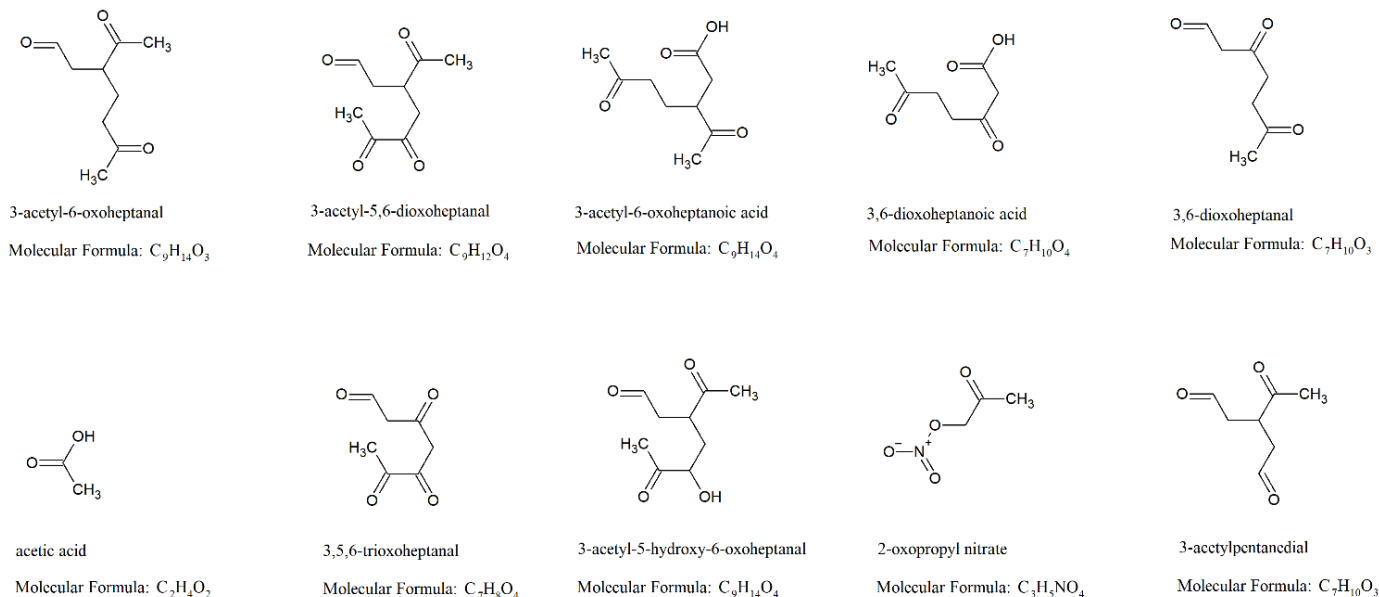

**Figure S12: Top 10 gas-phase products from limonene dark ozonolysis at the end of the low hydrocarbon (DO\_LHC) simulation.**

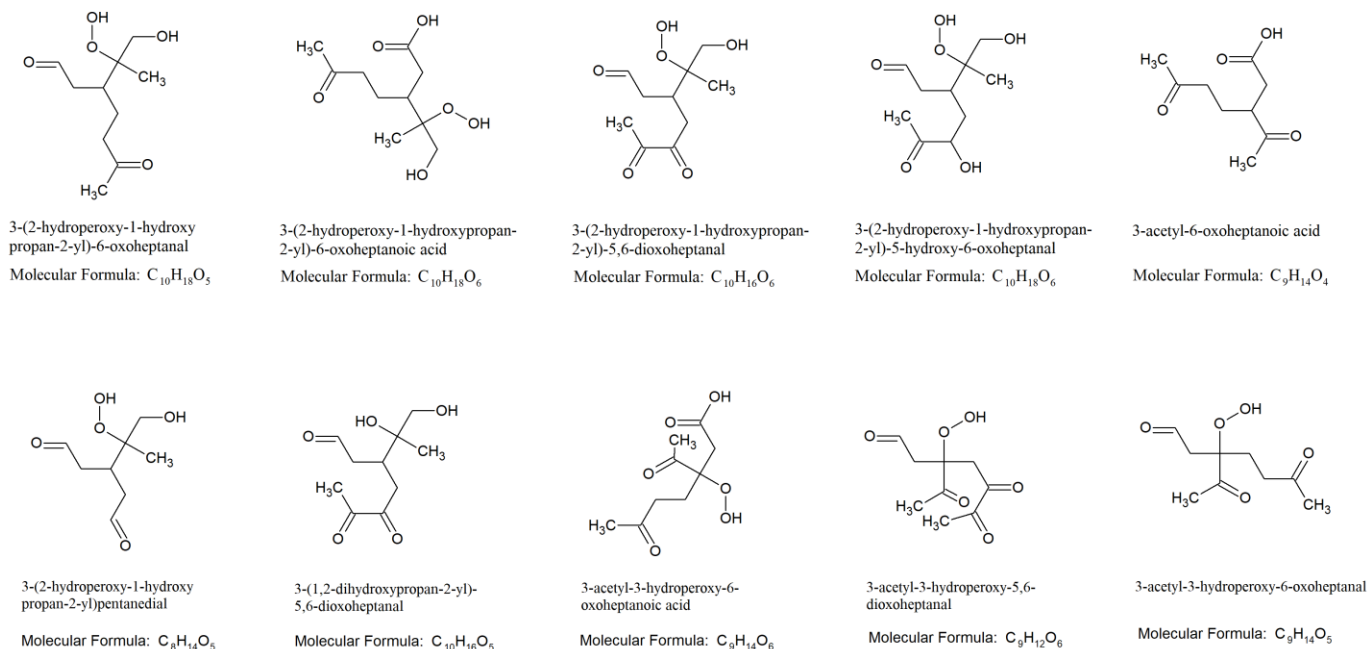

**Figure S13: Top 10 particle-phase products from limonene dark ozonolysis at the end of the low hydrocarbon (DO\_LHC) simulation.**

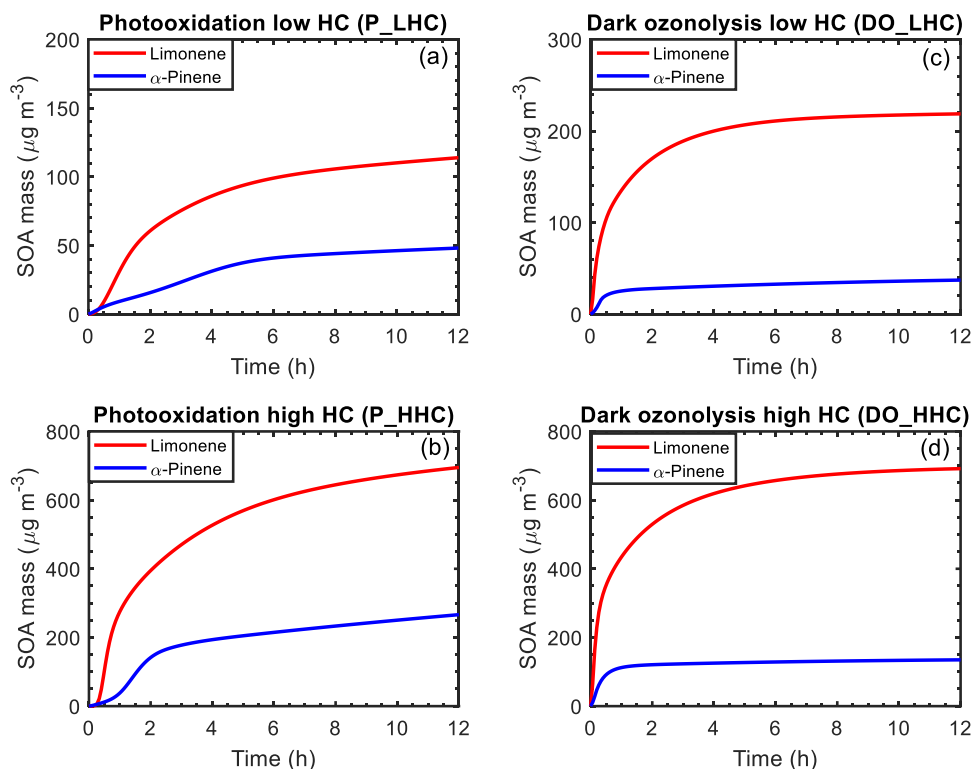

**Figure S14: Simulated SOA mass as a function of time for  $\alpha$ -pinene and limonene during photooxidation and dark ozonolysis with low hydrocarbon mixing ratio (50 ppb).**

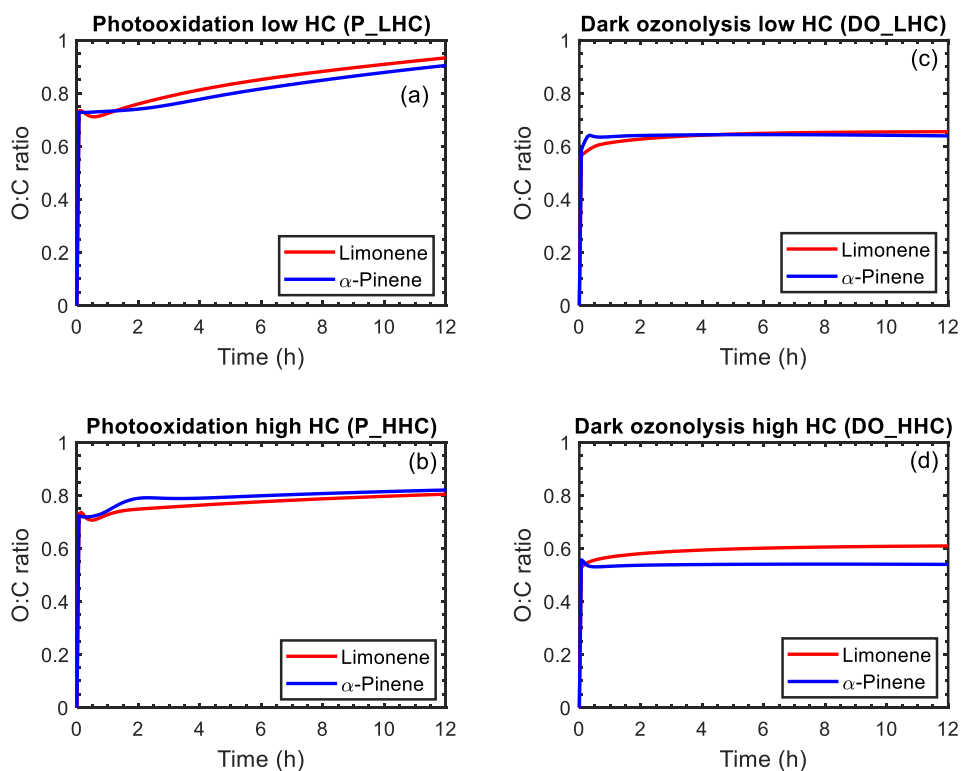

**Figure S15: Simulated average O/C as a function of time for  $\alpha$ -pinene and limonene during photooxidation and dark ozonolysis with low hydrocarbon mixing ratio (50 ppb).**

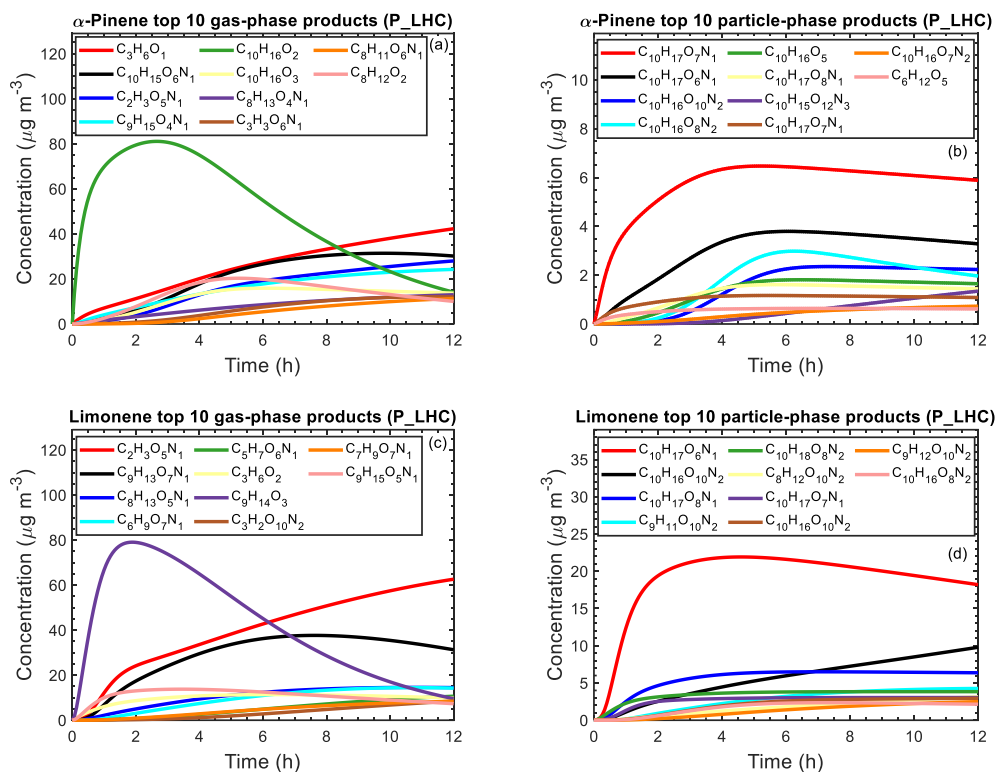

**Figure S16: Concentration of top 10 gas- and particle-phase products as a function of time for  $\alpha$ -pinene and limonene during photooxidation with low hydrocarbon mixing ratio (50 ppb).**

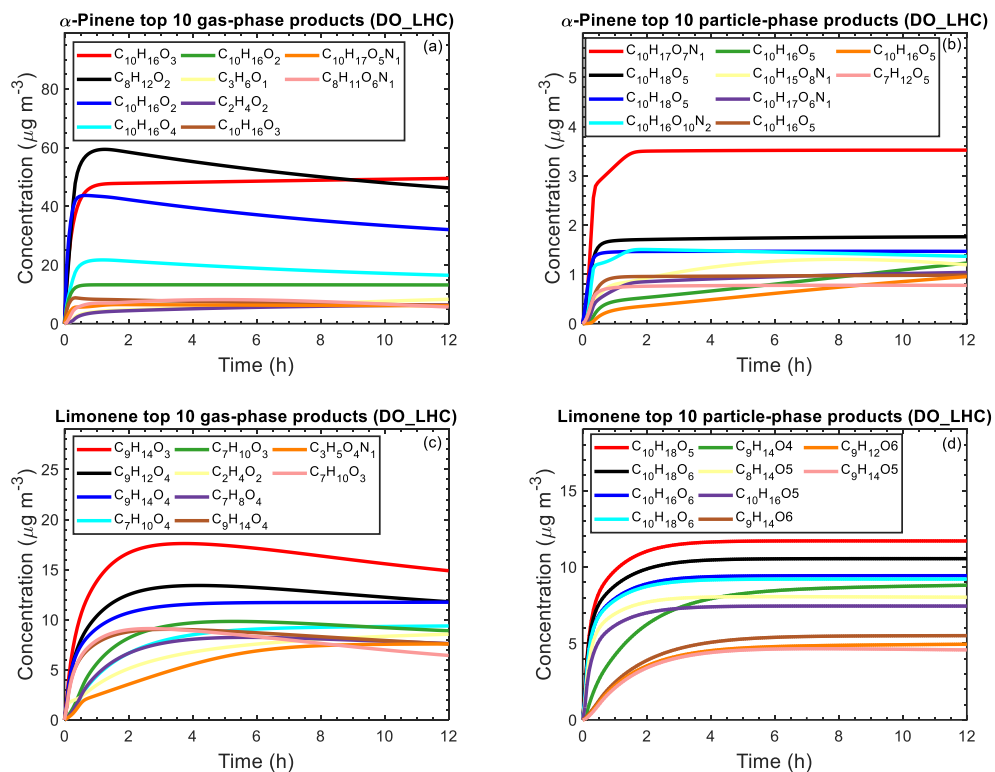

**Figure S17: Concentration of top 10 gas- and particle-phase products as a function of time for  $\alpha$ -pinene and limonene during dark ozonolysis with low hydrocarbon mixing ratio (50 ppb).**

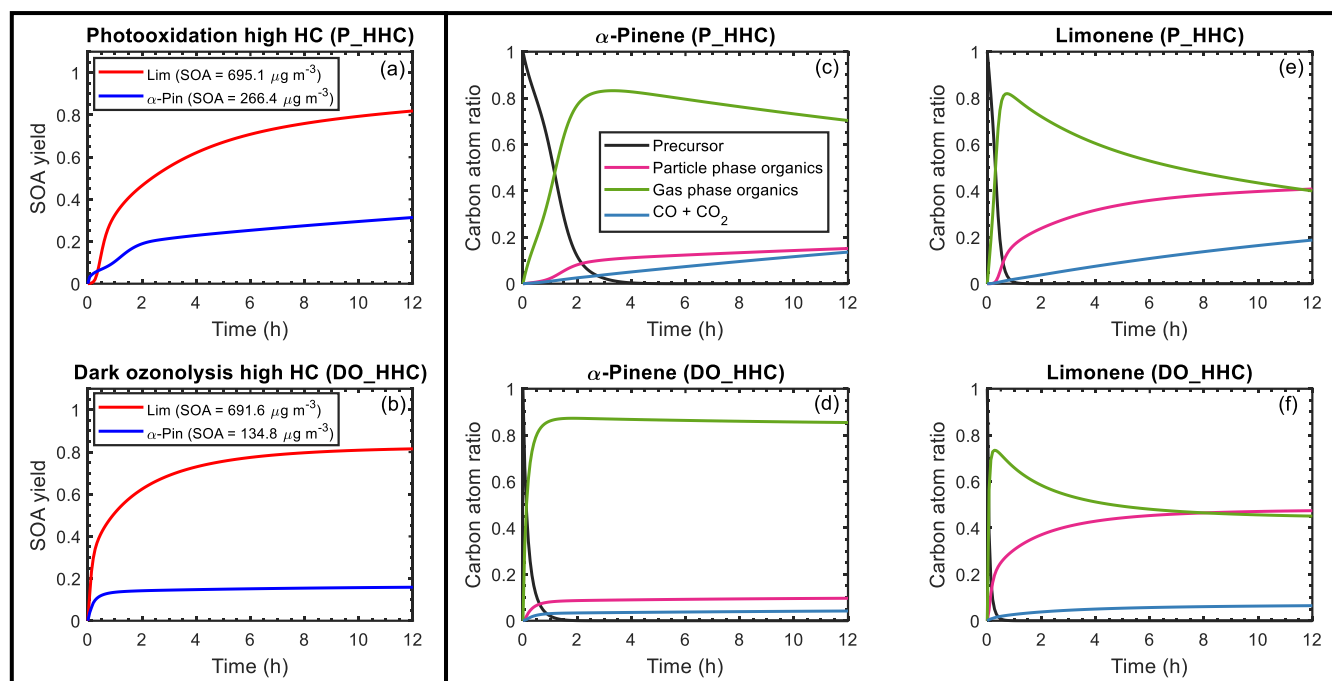

**Figure S18: Simulated SOA yield as a function of time (a and b) and carbon budget (c to f) for  $\alpha$ -pinene and limonene during photooxidation (a, c, e) and dark ozonolysis (b, d, f). The SOA yield curve for  $\alpha$ -pinene is represented by a blue line; limonene is represented by a red line. For the carbon budget plots, the mixing ratios of the precursor (black line), particle-phase organics (magenta line), gas-phase organics (green line), and CO+CO<sub>2</sub> (blue line) are expressed as carbon atom ratios (in ppbC)/initial precursor (in ppbC). The results shown are for the high hydrocarbon mixing ratio (150 ppb) simulations.**

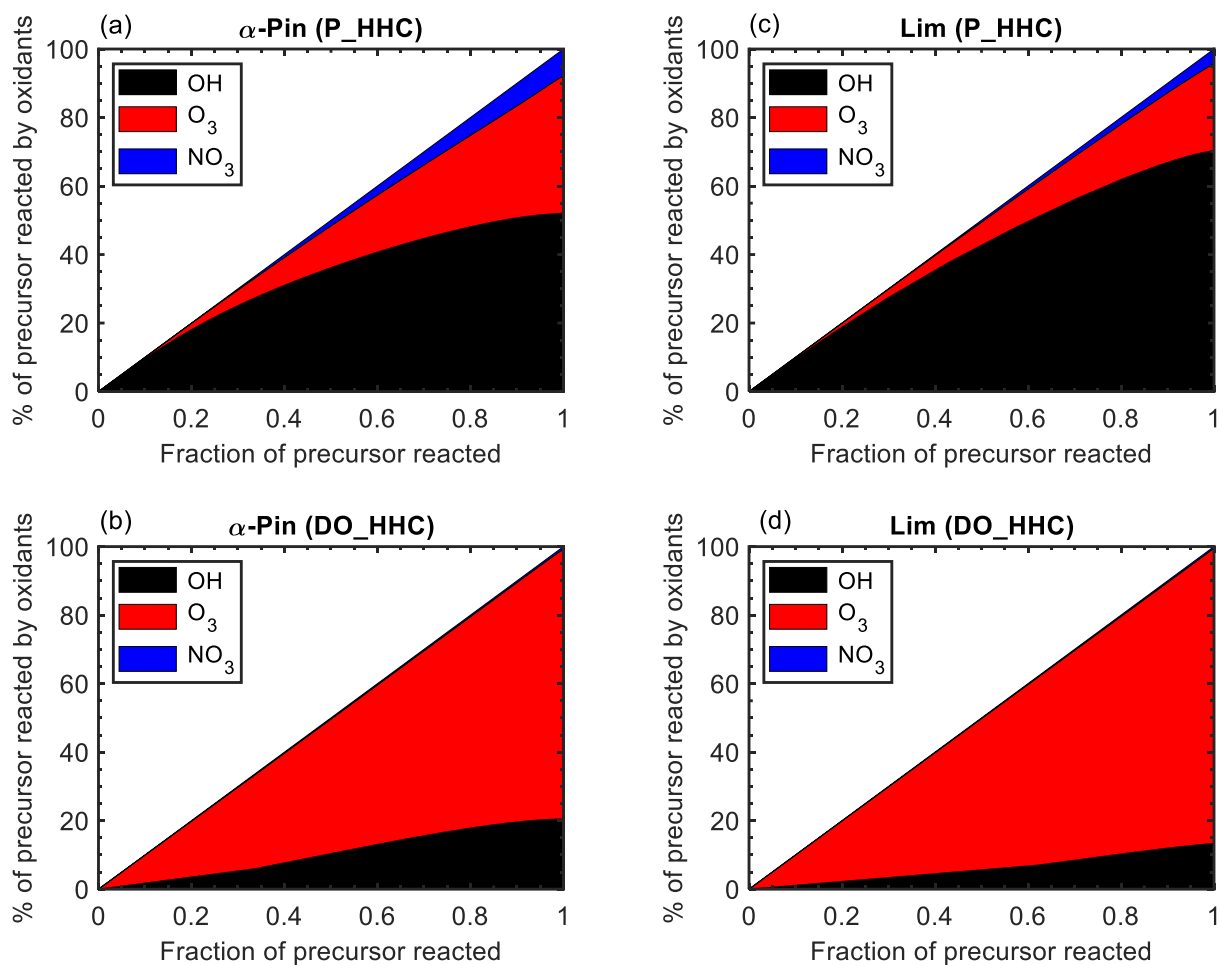

**Figure S19: Percentage of precursor consumed by OH (black), O<sub>3</sub> (red), and NO<sub>3</sub> (blue) as a function of fraction of precursor reacted for  $\alpha$ -pinene and limonene under photooxidation and ozonolysis (for higher initial precursor concentration of 150 ppb).**

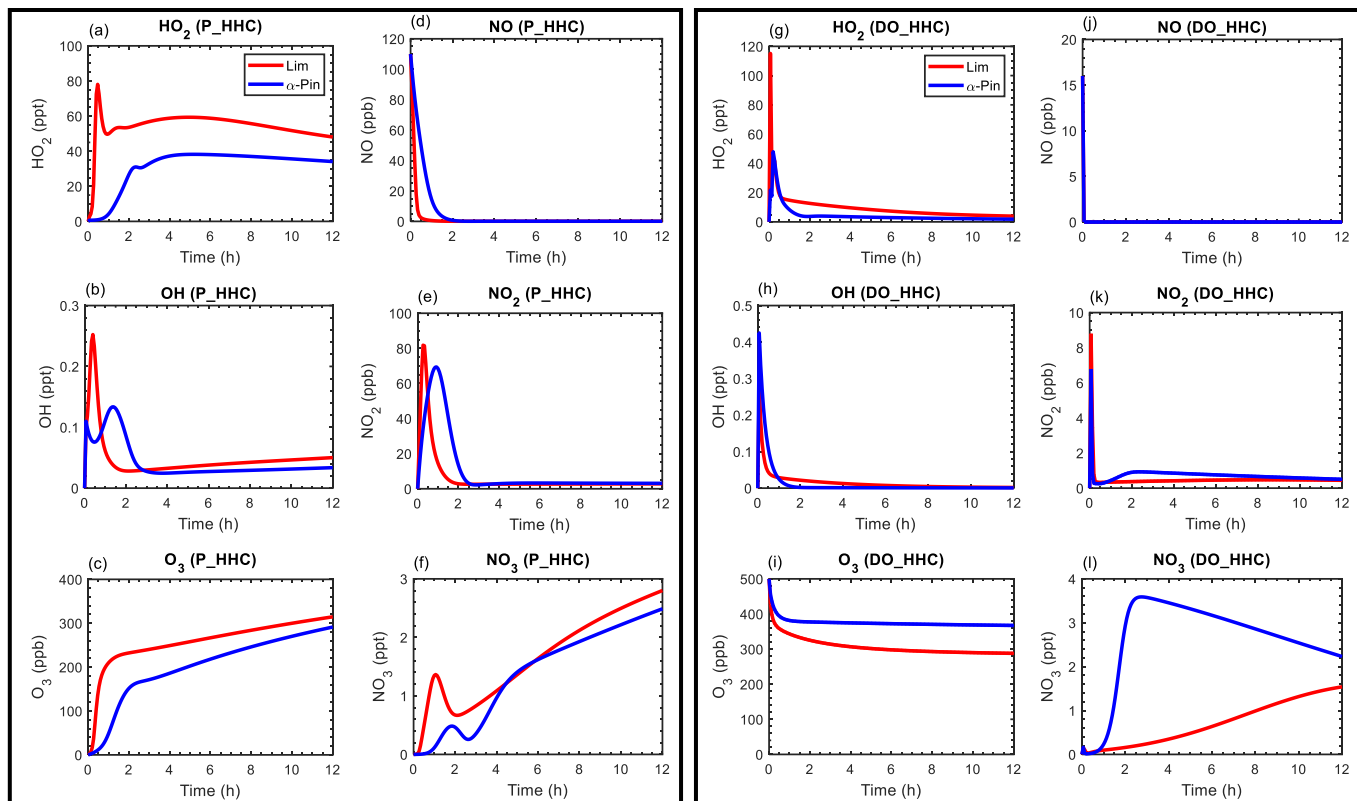

**Figure S20: Mixing ratios of HO<sub>2</sub>, OH, O<sub>3</sub>, NO, NO<sub>2</sub>, and NO<sub>3</sub> as function of time for limonene (red line), camphene (black line), and α-pinene (blue line) during the photooxidation and ozonolysis (with higher initial hydrocarbon mixing ratio of 150 ppb).**

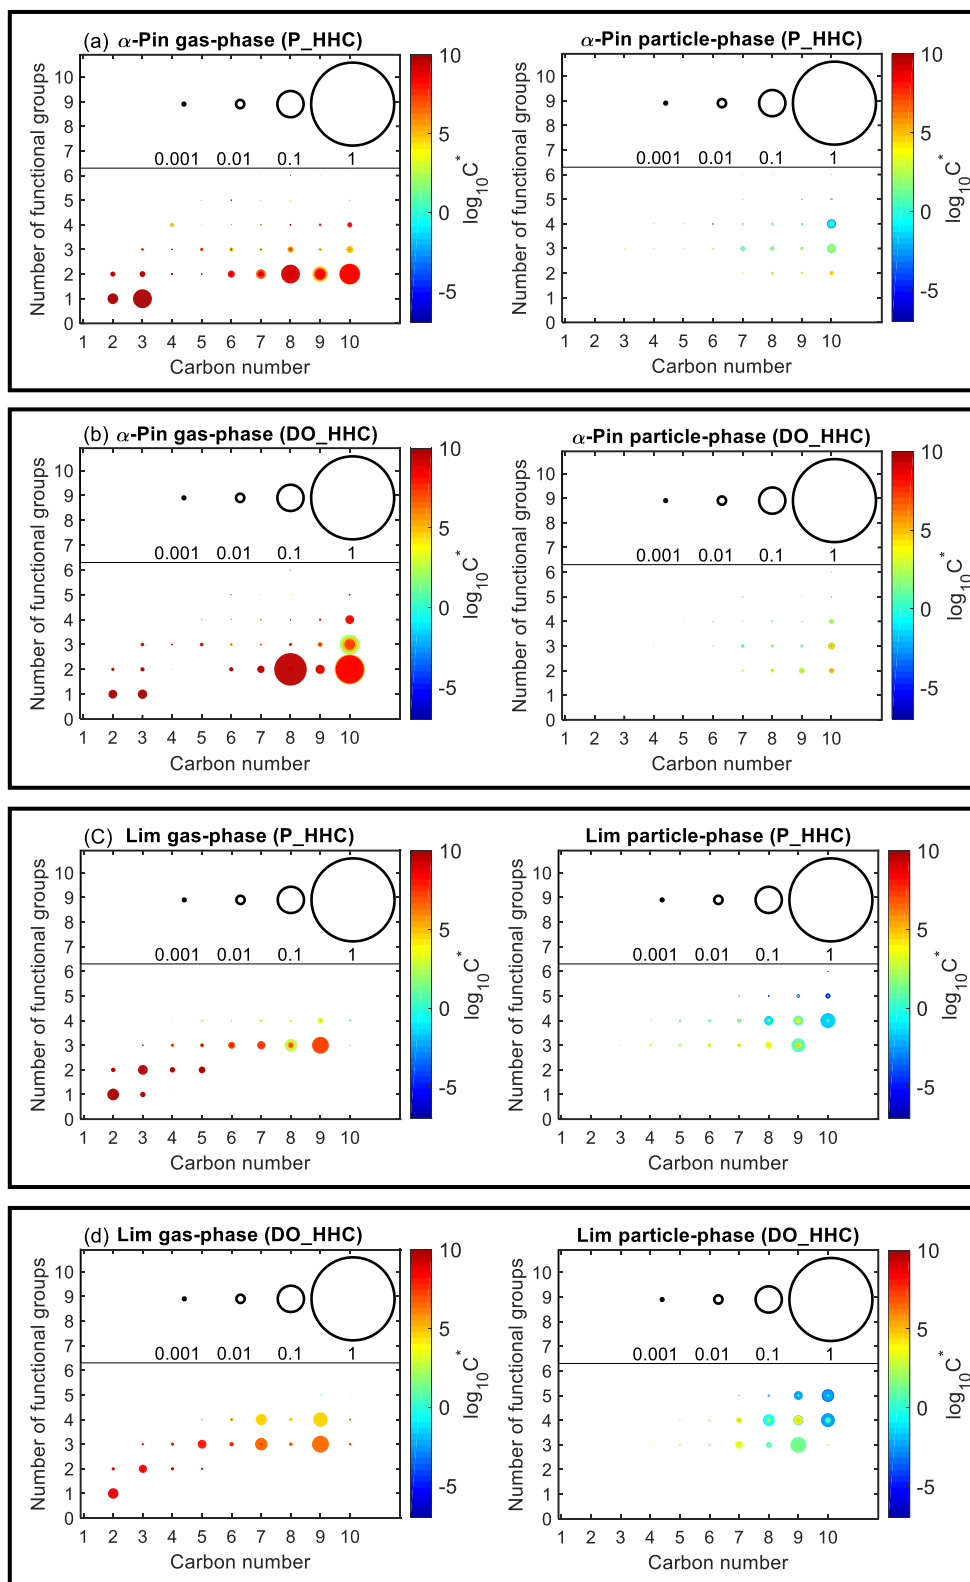

**Figure S21: Number of functional groups associated with gas- and particle-phase species as a function of carbon number. Results are shown for camphene,  $\alpha$ -pinene, and limonene after 12 hours of oxidation under photooxidation (P) and dark ozonolysis (DO) with higher hydrocarbon (LHC) mixing ratio of 150 ppb. The markers are sized by the ratio of their mixing ratio (in ppbC) to the initial mixing ratio of the precursor (in ppbC). The colors of the markers are scaled by volatility (represented by saturation concentration,  $C^*$ ).**

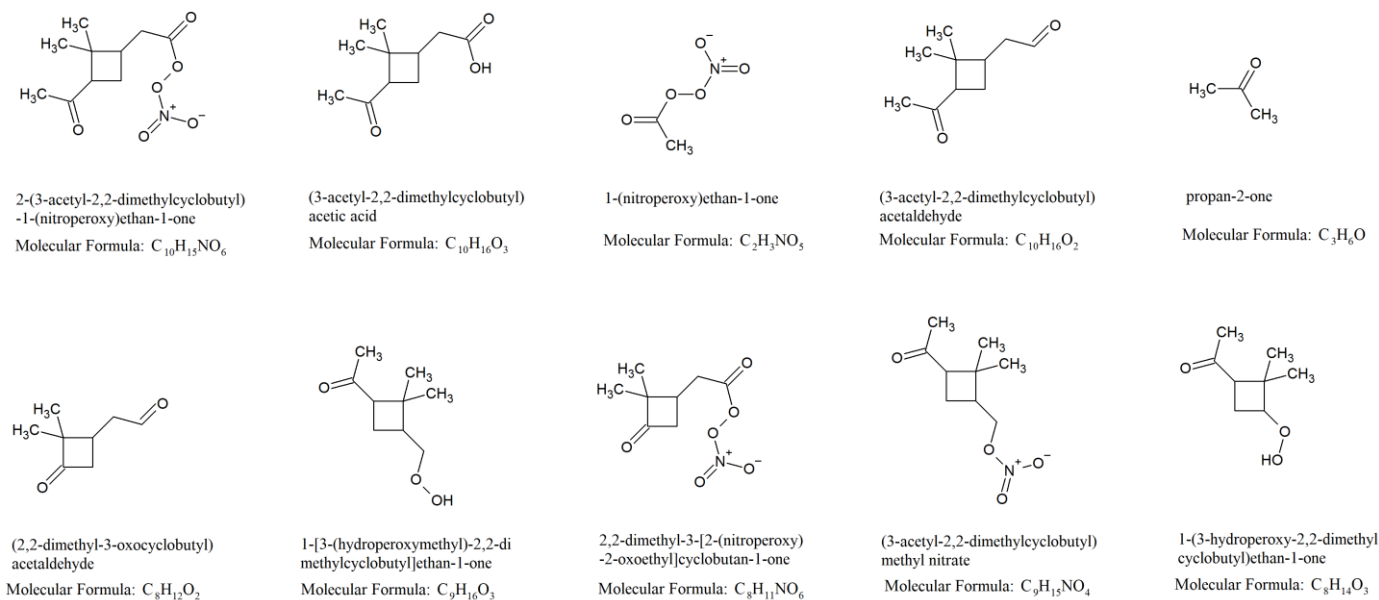

**Figure S22: Top 10 gas-phase products from  $\alpha$ -pinene photooxidation at the end of the high hydrocarbon (P\_HHC) simulations.**

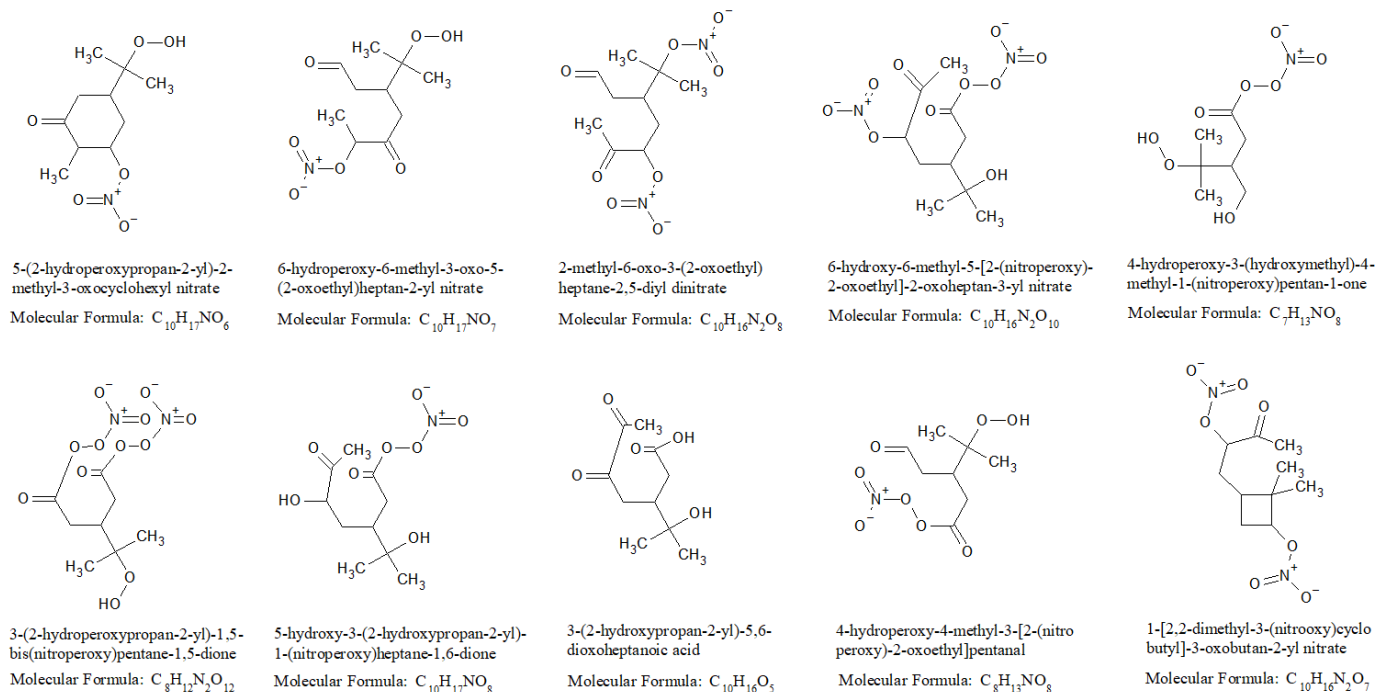

**Figure S23: Top 10 particle-phase products from  $\alpha$ -pinene photooxidation at the end of the high hydrocarbon (P\_HHC) simulations.**

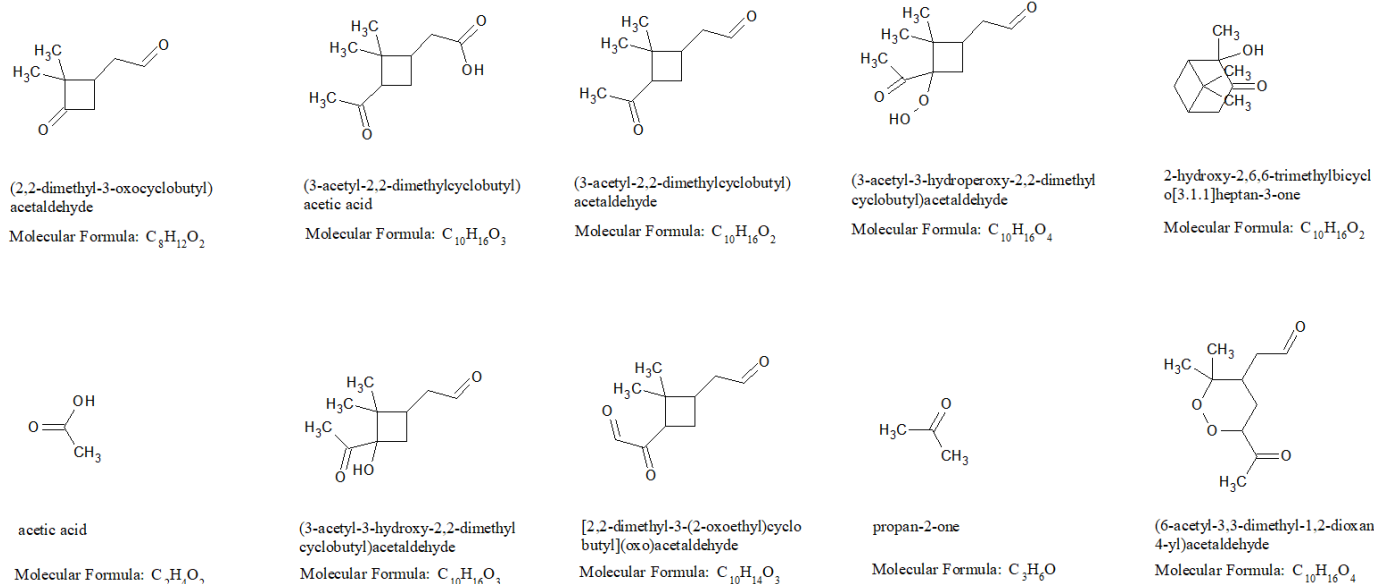

**Figure S24: Top 10 gas-phase products from  $\alpha$ -pinene dark ozonolysis at the end of the high hydrocarbon (DO\_HHC) simulations.**

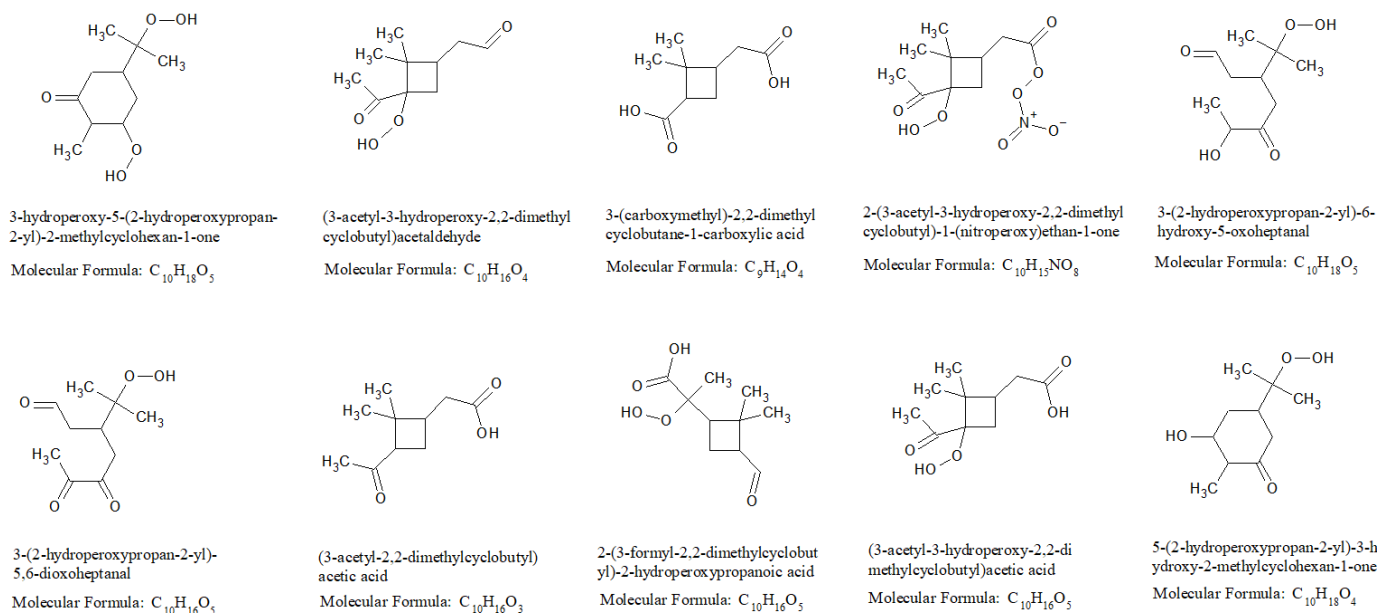

**Figure S25: Top 10 particle-phase products from  $\alpha$ -pinene dark ozonolysis at the end of the high hydrocarbon (DO\_HHC) simulations.**

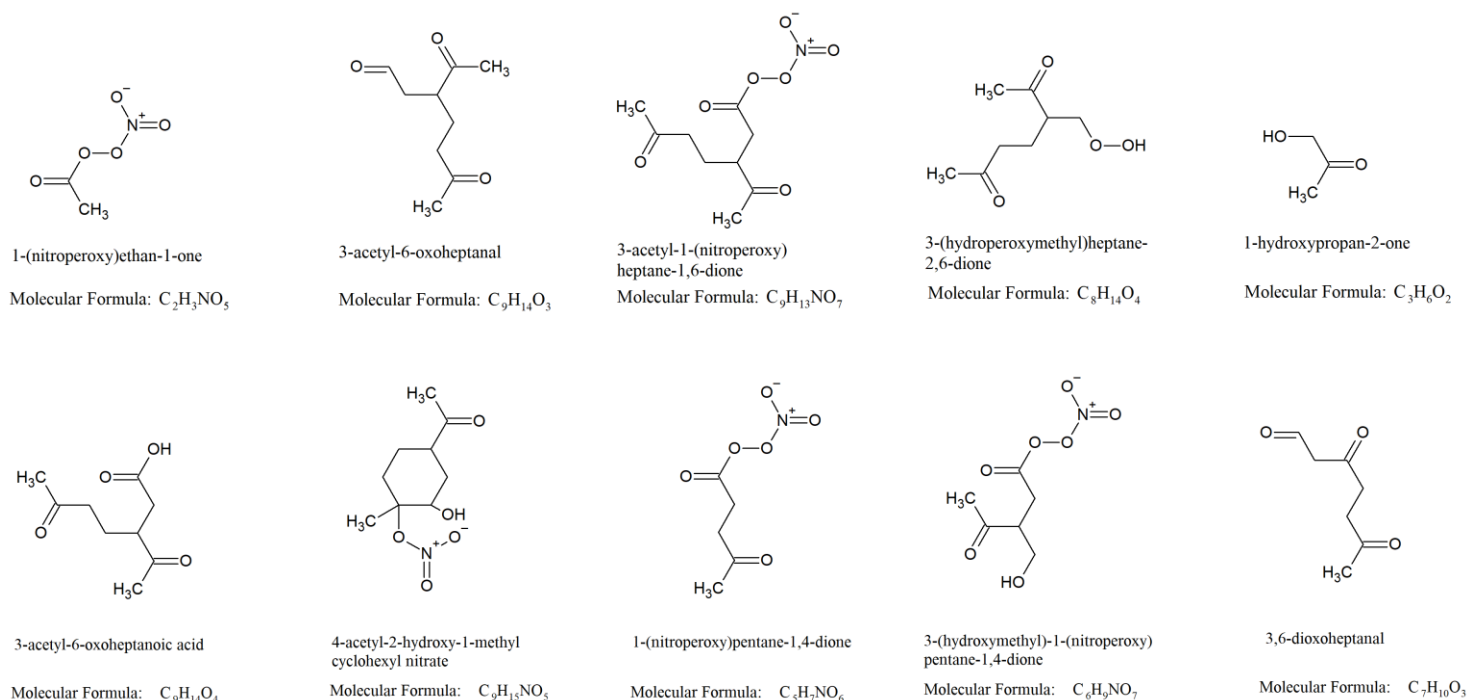

**Figure S26: Top 10 gas-phase products from limonene photooxidation at the end of the high hydrocarbon (P\_HHC).**

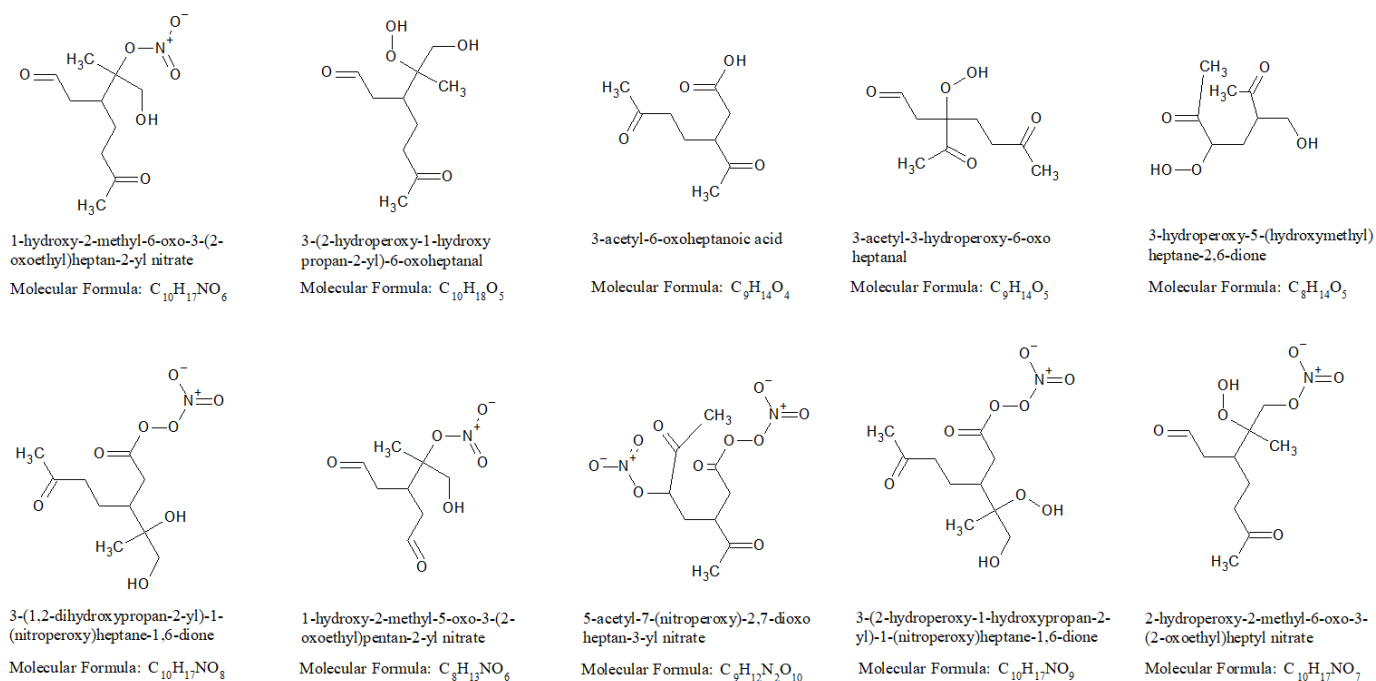

**Figure S27: Top 10 particle-phase products from limonene photooxidation at the end of the high hydrocarbon (P\_HHC).**

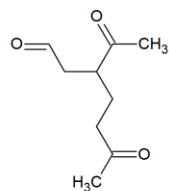

3-acetyl-6-oxoheptanal

Molecular Formula:  $C_9H_{14}O_3$

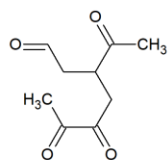

3-acetyl-5,6-dioxoheptanal

Molecular Formula:  $C_9H_{12}O_4$

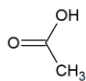

acetic acid

Molecular Formula:  $C_2H_4O_2$

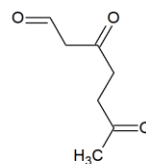

3,6-dioxoheptanal

Molecular Formula:  $C_7H_{10}O_3$

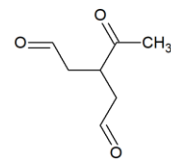

3-acetylpentanedial

Molecular Formula:  $C_7H_{10}O_3$

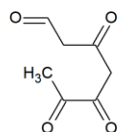

3,5,6-trioxoheptanal

Molecular Formula:  $C_7H_8O_4$

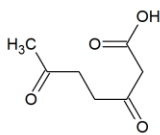

3,6-dioxoheptanoic acid

Molecular Formula:  $C_7H_{10}O_4$

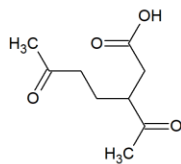

3-acetyl-6-oxoheptanoic acid

Molecular Formula:  $C_9H_{14}O_4$

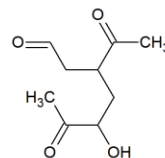

3-acetyl-5-hydroxy-6-oxoheptanal

Molecular Formula:  $C_9H_{14}O_4$

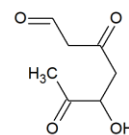

5-hydroxy-3,6-dioxoheptanal

Molecular Formula:  $C_7H_{10}O_4$

**Figure S28: Top 10 gas-phase products from limonene dark ozonolysis at the end of the high hydrocarbon (DO\_HHC).**

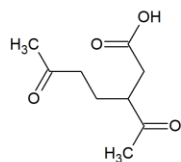

3-acetyl-6-oxoheptanoic acid

Molecular Formula:  $C_9H_{14}O_4$

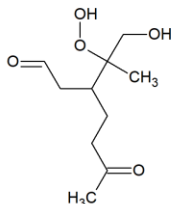

3-(2-hydroperoxy-1-hydroxypropan-2-yl)-6-oxoheptanal

Molecular Formula:  $C_{10}H_{18}O_5$

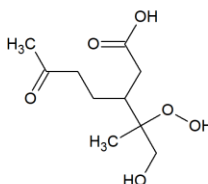

3-(2-hydroperoxy-1-hydroxypropan-2-yl)-6-oxoheptanoic acid

Molecular Formula:  $C_{10}H_{18}O_6$

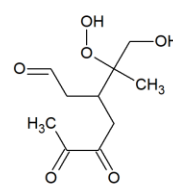

3-(2-hydroperoxy-1-hydroxypropan-2-yl)-5,6-dioxoheptanal

Molecular Formula:  $C_{10}H_{16}O_6$

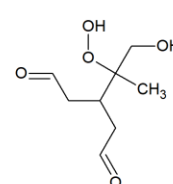

3-(2-hydroperoxy-1-hydroxypropan-2-yl)pentanedial

Molecular Formula:  $C_8H_{14}O_5$

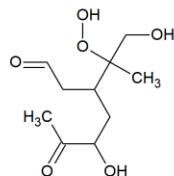

3-(2-hydroperoxy-1-hydroxypropan-2-yl)-5-hydroxy-6-oxoheptanal

Molecular Formula:  $C_{10}H_{18}O_6$

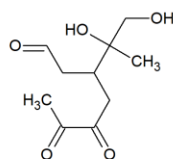

3-(1,2-dihydroxypropan-2-yl)-5,6-dioxoheptanal

Molecular Formula:  $C_{10}H_{16}O_5$

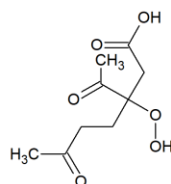

3-acetyl-3-hydroperoxy-6-oxoheptanoic acid

Molecular Formula:  $C_9H_{14}O_6$

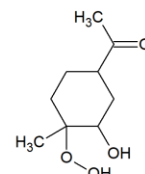

1-(4-hydroperoxy-3-hydroxy-4-methylcyclohexyl)ethan-1-one

Molecular Formula:  $C_9H_{16}O_4$

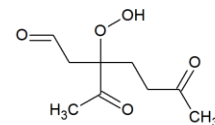

3-acetyl-3-hydroperoxy-6-oxoheptanal

Molecular Formula:  $C_9H_{14}O_5$

**Figure S29: Top 10 particle-phase products from limonene dark ozonolysis at the end of the high hydrocarbon (DO\_HHC).**

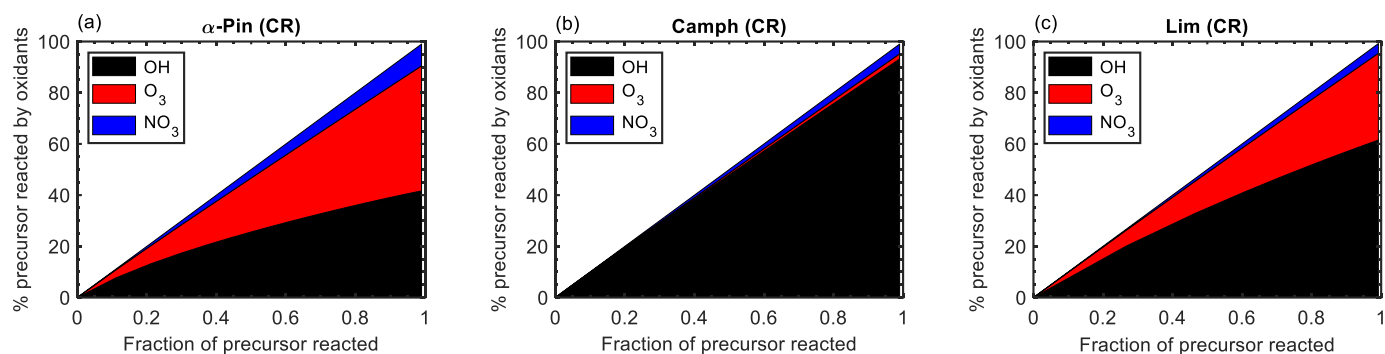

**Figure S30: Percentage of precursor reacted by OH (black),  $O_3$  (red), and  $NO_3$  (blue) as a function of fraction of precursor reacted for  $\alpha$ -pinene, camphene, and limonene during controlled reactivity (CR) simulations.**

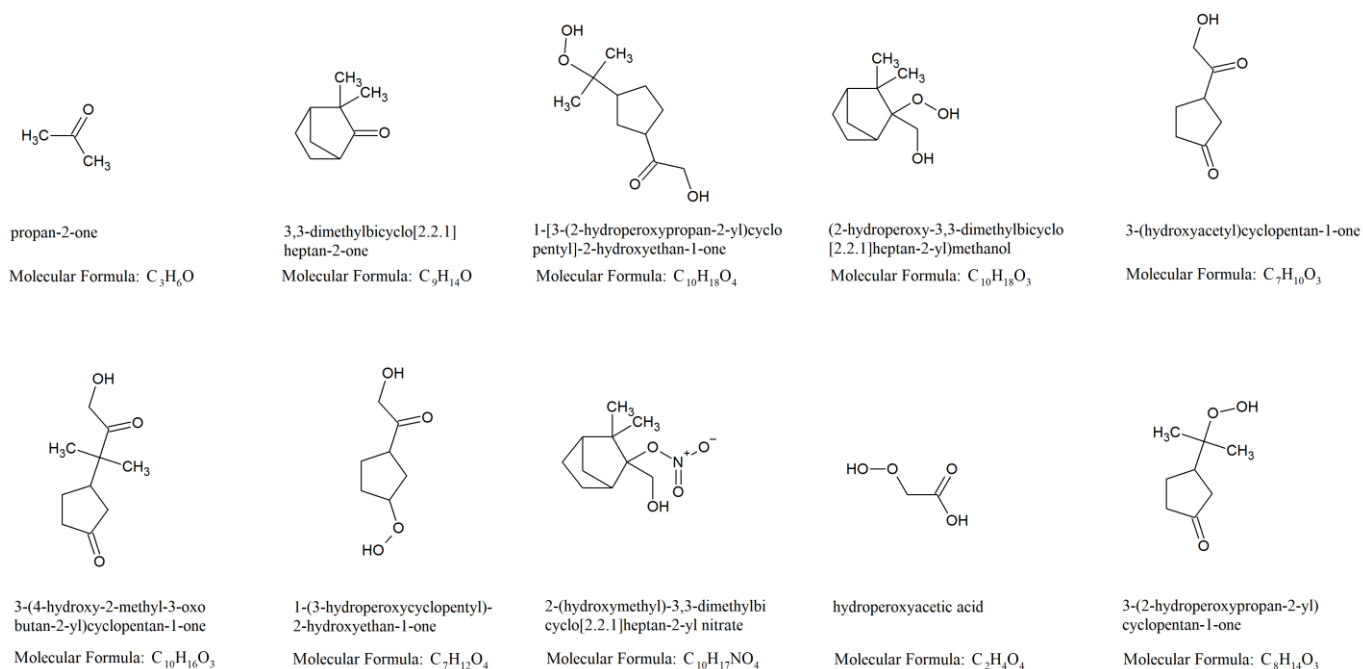

**Figure S31: Top 10 gas-phase products from camphene at the end of the controlled reactivity simulation.**

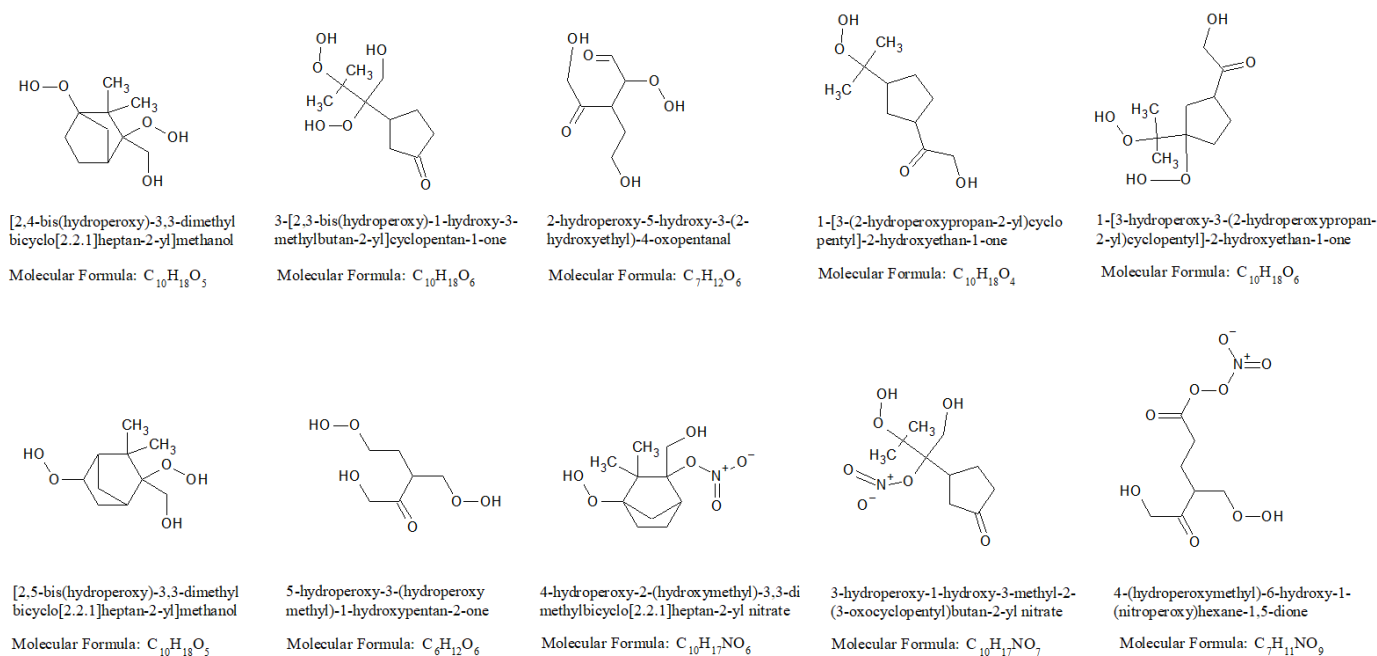

**Figure S32: Top 10 particle-phase products from camphene at the end of the controlled reactivity simulation.**

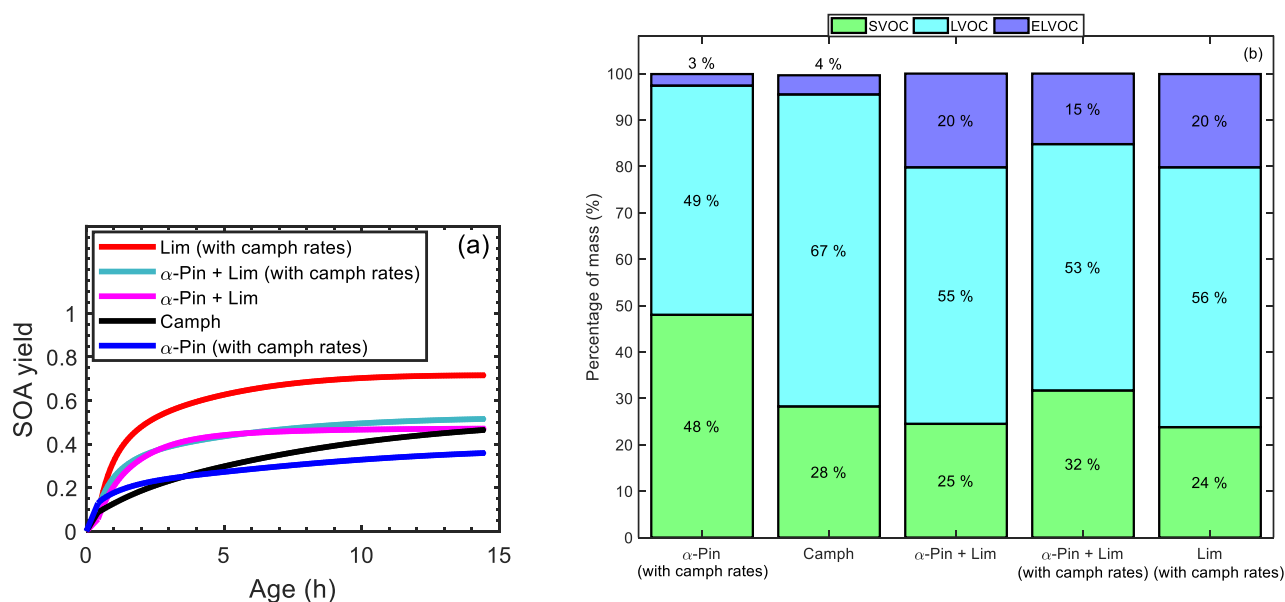

**Figure S33: (a) Simulated SOA yield as a function of atmospheric aging time for: camphene (black line), 50 %  $\alpha$ -pinene + 50 % limonene (magenta line),  $\alpha$ -pinene with camphene rate constants (blue line), limonene with camphene rate constants (red line), and 50 %  $\alpha$ -pinene + 50 % limonene where the rate constants of  $\alpha$ -pinene and limonene were replaced with the rate constants of camphene (green line); and (b) mass percentage of particle-phase compounds binned in four volatility categories at the end of the controlled reactivity simulations for: camphene, 50 %  $\alpha$ -pinene + 50 % limonene,  $\alpha$ -pinene with camphene rate constants, limonene with camphene rate constants, and 50 %  $\alpha$ -pinene + 50 % limonene where the rate constants of  $\alpha$ -pinene and limonene were replaced with the rate constants of camphene.**
